# Supplementary material
Source: PubMed Central journal article supplement (PMC4314325)
Supplement: NIHMS638306-supplement-Supp_1.pdf [file NIHMS638306-supplement-Supp_1.pdf]

| # AmpliSeq_Version=2.01 |           |             |            |           |         |            |             |              |             |          |
|-------------------------|-----------|-------------|------------|-----------|---------|------------|-------------|--------------|-------------|----------|
| # Genome=hg19           |           |             |            |           |         |            |             |              |             |          |
| # Workflow=DNA          |           |             |            |           |         |            |             |              |             |          |
| # Total_Targets=1341    |           |             |            |           |         |            |             |              |             |          |
| # Total_Amplicons=2875  |           |             |            |           |         |            |             |              |             |          |
| Request_ID              | Target_ID | Gene_Symbol | Chromosome | Chr_Start | Chr_End | Num_Amplic | Total_Bases | Covered_Base | Missed_Base | Coverage |
| IAD39139                | 438865    | IRF4        | chr6       | 393147    | 393373  | 2          | 227         | 227          | 0           | 1        |
| IAD39139                | 438860    | IRF4        | chr6       | 394815    | 395012  | 2          | 198         | 198          | 0           | 1        |
| IAD39139                | 438858    | IRF4        | chr6       | 395841    | 395940  | 1          | 100         | 100          | 0           | 1        |
| IAD39139                | 438862    | IRF4        | chr6       | 397105    | 397257  | 1          | 153         | 150          | 3           | 0.98     |
| IAD39139                | 438866    | IRF4        | chr6       | 397102    | 397257  | 1          | 156         | 150          | 6           | 0.962    |
| IAD39139                | 438859    | IRF4        | chr6       | 398822    | 398940  | 1          | 119         | 119          | 0           | 1        |
| IAD39139                | 438864    | IRF4        | chr6       | 401418    | 401782  | 3          | 365         | 365          | 0           | 1        |
| IAD39139                | 438863    | IRF4        | chr6       | 405012    | 405135  | 1          | 124         | 124          | 0           | 1        |
| IAD39139                | 438861    | IRF4        | chr6       | 407449    | 407603  | 1          | 155         | 121          | 34          | 0.781    |
| IAD39139                | 500073    | CRBN        | chr3       | 3192543   | 3192734 | 2          | 192         | 192          | 0           | 1        |
| IAD39139                | 500074    | CRBN        | chr3       | 3194134   | 3194276 | 2          | 143         | 143          | 0           | 1        |
| IAD39139                | 500072    | CRBN        | chr3       | 3195102   | 3195177 | 1          | 76          | 76           | 0           | 1        |
| IAD39139                | 500066    | CRBN        | chr3       | 3195638   | 3195764 | 1          | 127         | 127          | 0           | 1        |
| IAD39139                | 500067    | CRBN        | chr3       | 3196425   | 3196520 | 1          | 96          | 96           | 0           | 1        |
| IAD39139                | 500075    | CRBN        | chr3       | 3197897   | 3197970 | 1          | 74          | 74           | 0           | 1        |
| IAD39139                | 500070    | CRBN        | chr3       | 3209312   | 3209482 | 2          | 171         | 171          | 0           | 1        |
| IAD39139                | 500071    | CRBN        | chr3       | 3214454   | 3214614 | 2          | 161         | 161          | 0           | 1        |
| IAD39139                | 500064    | CRBN        | chr3       | 3215737   | 3215950 | 2          | 214         | 214          | 0           | 1        |
| IAD39139                | 500065    | CRBN        | chr3       | 3216841   | 3216955 | 2          | 115         | 115          | 0           | 1        |
| IAD39139                | 500069    | CRBN        | chr3       | 3216841   | 3216958 | 2          | 118         | 118          | 0           | 1        |
| IAD39139                | 500068    | CRBN        | chr3       | 3221299   | 3221376 | 1          | 78          | 78           | 0           | 1        |
| IAD39139                | 423072    | TP53        | chr17      | 7572921   | 7573013 | 1          | 93          | 93           | 0           | 1        |
| IAD39139                | 423062    | TP53        | chr17      | 7573921   | 7574038 | 1          | 118         | 118          | 0           | 1        |
| IAD39139                | 423065    | TP53        | chr17      | 7576531   | 7576589 | 2          | 59          | 30           | 29          | 0.508    |
| IAD39139                | 423074    | TP53        | chr17      | 7576619   | 7576662 | 0          | 44          | 44           | 0           | 1        |
| IAD39139                | 423064    | TP53        | chr17      | 7576847   | 7576931 | 1          | 85          | 85           | 0           | 1        |
| IAD39139                | 423068    | TP53        | chr17      | 7577013   | 7577160 | 1          | 148         | 148          | 0           | 1        |
| IAD39139                | 423069    | TP53        | chr17      | 7577493   | 7577613 | 2          | 121         | 121          | 0           | 1        |
| IAD39139                | 423063    | TP53        | chr17      | 7578171   | 7578294 | 2          | 124         | 124          | 0           | 1        |
| IAD39139                | 423071    | TP53        | chr17      | 7578365   | 7578538 | 2          | 174         | 174          | 0           | 1        |
| IAD39139                | 423066    | TP53        | chr17      | 7578365   | 7578559 | 2          | 195         | 195          | 0           | 1        |
| IAD39139                | 423067    | TP53        | chr17      | 7579306   | 7579595 | 3          | 290         | 290          | 0           | 1        |
| IAD39139                | 423073    | TP53        | chr17      | 7579694   | 7579726 | 1          | 33          | 33           | 0           | 1        |
| IAD39139                | 423070    | TP53        | chr17      | 7579833   | 7579917 | 1          | 85          | 85           | 0           | 1        |
| IAD39139                | 433670    | PTPRD       | chr9       | 8317868   | 8317947 | 1          | 80          | 80           | 0           | 1        |
| IAD39139                | 433660    | PTPRD       | chr9       | 8319825   | 8319971 | 1          | 147         | 147          | 0           | 1        |
| IAD39139                | 433669    | PTPRD       | chr9       | 8331576   | 8331741 | 1          | 166         | 166          | 0           | 1        |
| IAD39139                | 433685    | PTPRD       | chr9       | 8338916   | 8339052 | 2          | 137         | 137          | 0           | 1        |
| IAD39139                | 433683    | PTPRD       | chr9       | 8340337   | 8340474 | 2          | 138         | 138          | 0           | 1        |
| IAD39139                | 433664    | PTPRD       | chr9       | 8341084   | 8341273 | 2          | 190         | 190          | 0           | 1        |
| IAD39139                | 433675    | PTPRD       | chr9       | 8341687   | 8341983 | 3          | 297         | 297          | 0           | 1        |
| IAD39139                | 433679    | PTPRD       | chr9       | 8375930   | 8376095 | 2          | 166         | 166          | 0           | 1        |
| IAD39139                | 433653    | PTPRD       | chr9       | 8376601   | 8376731 | 2          | 131         | 131          | 0           | 1        |
| IAD39139                | 433652    | PTPRD       | chr9       | 8389226   | 8389412 | 2          | 187         | 187          | 0           | 1        |
| IAD39139                | 433671    | PTPRD       | chr9       | 8404531   | 8404665 | 2          | 135         | 135          | 0           | 1        |
| IAD39139                | 433654    | PTPRD       | chr9       | 8436586   | 8436694 | 2          | 109         | 109          | 0           | 1        |
| IAD39139                | 433673    | PTPRD       | chr9       | 8437192   | 8437244 | 2          | 53          | 53           | 0           | 1        |
| IAD39139                | 433659    | PTPRD       | chr9       | 8449719   | 8449842 | 1          | 124         | 124          | 0           | 1        |
| IAD39139                | 433655    | PTPRD       | chr9       | 8454574   | 8454596 | 1          | 23          | 23           | 0           | 1        |
| IAD39139                | 433656    | PTPRD       | chr9       | 8454574   | 8454599 | 1          | 26          | 26           | 0           | 1        |
| IAD39139                | 433684    | PTPRD       | chr9       | 8460405   | 8460576 | 2          | 172         | 172          | 0           | 1        |
| IAD39139                | 433682    | PTPRD       | chr9       | 8465460   | 8465680 | 2          | 221         | 221          | 0           | 1        |
| IAD39139                | 433650    | PTPRD       | chr9       | 8470989   | 8471090 | 1          | 102         | 102          | 0           | 1        |
| IAD39139                | 433666    | PTPRD       | chr9       | 8484113   | 8484383 | 2          | 271         | 271          | 0           | 1        |
| IAD39139                | 433677    | PTPRD       | chr9       | 8485221   | 8485329 | 2          | 109         | 109          | 0           | 1        |

|          |        |       |       |          |          |   |     |     |    |       |
|----------|--------|-------|-------|----------|----------|---|-----|-----|----|-------|
| IAD39139 | 433676 | PTPRD | chr9  | 8485221  | 8485332  | 2 | 112 | 112 | 0  | 1     |
| IAD39139 | 433647 | PTPRD | chr9  | 8485756  | 8486354  | 4 | 599 | 599 | 0  | 1     |
| IAD39139 | 433674 | PTPRD | chr9  | 8492856  | 8492984  | 1 | 129 | 129 | 0  | 1     |
| IAD39139 | 433668 | PTPRD | chr9  | 8497236  | 8497273  | 1 | 38  | 38  | 0  | 1     |
| IAD39139 | 433680 | PTPRD | chr9  | 8499641  | 8499845  | 3 | 205 | 205 | 0  | 1     |
| IAD39139 | 433672 | PTPRD | chr9  | 8500748  | 8501064  | 3 | 317 | 317 | 0  | 1     |
| IAD39139 | 433651 | PTPRD | chr9  | 8504255  | 8504410  | 2 | 156 | 156 | 0  | 1     |
| IAD39139 | 433665 | PTPRD | chr9  | 8507295  | 8507439  | 1 | 145 | 145 | 0  | 1     |
| IAD39139 | 433658 | PTPRD | chr9  | 8517842  | 8518434  | 4 | 593 | 593 | 0  | 1     |
| IAD39139 | 433649 | PTPRD | chr9  | 8521271  | 8521551  | 2 | 281 | 281 | 0  | 1     |
| IAD39139 | 433681 | PTPRD | chr9  | 8523507  | 8523529  | 1 | 23  | 23  | 0  | 1     |
| IAD39139 | 433663 | PTPRD | chr9  | 8524919  | 8525040  | 1 | 122 | 122 | 0  | 1     |
| IAD39139 | 433661 | PTPRD | chr9  | 8526621  | 8526649  | 1 | 29  | 29  | 0  | 1     |
| IAD39139 | 433667 | PTPRD | chr9  | 8527339  | 8527358  | 1 | 20  | 20  | 0  | 1     |
| IAD39139 | 433662 | PTPRD | chr9  | 8528585  | 8528784  | 3 | 200 | 200 | 0  | 1     |
| IAD39139 | 433678 | PTPRD | chr9  | 8633311  | 8633463  | 1 | 153 | 153 | 0  | 1     |
| IAD39139 | 433657 | PTPRD | chr9  | 8636693  | 8636849  | 2 | 157 | 157 | 0  | 1     |
| IAD39139 | 433648 | PTPRD | chr9  | 8733774  | 8733848  | 1 | 75  | 75  | 0  | 1     |
| IAD39139 | 581704 | PSMG2 | chr18 | 12703101 | 12703168 | 1 | 68  | 68  | 0  | 1     |
| IAD39139 | 581707 | PSMG2 | chr18 | 12706579 | 12706725 | 2 | 147 | 102 | 45 | 0.694 |
| IAD39139 | 581705 | PSMG2 | chr18 | 12706543 | 12706725 | 2 | 183 | 138 | 45 | 0.754 |
| IAD39139 | 581708 | PSMG2 | chr18 | 12712695 | 12712764 | 2 | 70  | 70  | 0  | 1     |
| IAD39139 | 581706 | PSMG2 | chr18 | 12718510 | 12718639 | 2 | 130 | 130 | 0  | 1     |
| IAD39139 | 581702 | PSMG2 | chr18 | 12720503 | 12720687 | 2 | 185 | 185 | 0  | 1     |
| IAD39139 | 581703 | PSMG2 | chr18 | 12724492 | 12724623 | 2 | 132 | 132 | 0  | 1     |
| IAD39139 | 581701 | PSMG2 | chr18 | 12725432 | 12725535 | 1 | 104 | 88  | 16 | 0.846 |
| IAD39139 | 429044 | DNAH5 | chr5  | 13692087 | 13692249 | 2 | 163 | 163 | 0  | 1     |
| IAD39139 | 429031 | DNAH5 | chr5  | 13700743 | 13700985 | 2 | 243 | 243 | 0  | 1     |
| IAD39139 | 429079 | DNAH5 | chr5  | 13701387 | 13701550 | 2 | 164 | 164 | 0  | 1     |
| IAD39139 | 429057 | DNAH5 | chr5  | 13708226 | 13708449 | 2 | 224 | 224 | 0  | 1     |
| IAD39139 | 429014 | DNAH5 | chr5  | 13714508 | 13714734 | 2 | 227 | 227 | 0  | 1     |
| IAD39139 | 429034 | DNAH5 | chr5  | 13716590 | 13716804 | 2 | 215 | 215 | 0  | 1     |
| IAD39139 | 429061 | DNAH5 | chr5  | 13717418 | 13717634 | 2 | 217 | 217 | 0  | 1     |
| IAD39139 | 429052 | DNAH5 | chr5  | 13718985 | 13719215 | 2 | 231 | 231 | 0  | 1     |
| IAD39139 | 429029 | DNAH5 | chr5  | 13721103 | 13721359 | 2 | 257 | 237 | 20 | 0.922 |
| IAD39139 | 429017 | DNAH5 | chr5  | 13727610 | 13727770 | 2 | 161 | 161 | 0  | 1     |
| IAD39139 | 429076 | DNAH5 | chr5  | 13729542 | 13729674 | 2 | 133 | 133 | 0  | 1     |
| IAD39139 | 429087 | DNAH5 | chr5  | 13735234 | 13735435 | 2 | 202 | 202 | 0  | 1     |
| IAD39139 | 429086 | DNAH5 | chr5  | 13735921 | 13736046 | 2 | 126 | 126 | 0  | 1     |
| IAD39139 | 429089 | DNAH5 | chr5  | 13737355 | 13737609 | 2 | 255 | 255 | 0  | 1     |
| IAD39139 | 429082 | DNAH5 | chr5  | 13751181 | 13751374 | 2 | 194 | 194 | 0  | 1     |
| IAD39139 | 429073 | DNAH5 | chr5  | 13752237 | 13752403 | 1 | 167 | 167 | 0  | 1     |
| IAD39139 | 429033 | DNAH5 | chr5  | 13753336 | 13753663 | 3 | 328 | 328 | 0  | 1     |
| IAD39139 | 429072 | DNAH5 | chr5  | 13754306 | 13754452 | 2 | 147 | 147 | 0  | 1     |
| IAD39139 | 429046 | DNAH5 | chr5  | 13758949 | 13759097 | 1 | 149 | 149 | 0  | 1     |
| IAD39139 | 429062 | DNAH5 | chr5  | 13762825 | 13763015 | 2 | 191 | 191 | 0  | 1     |
| IAD39139 | 429080 | DNAH5 | chr5  | 13766079 | 13766293 | 2 | 215 | 215 | 0  | 1     |
| IAD39139 | 429047 | DNAH5 | chr5  | 13769063 | 13769250 | 2 | 188 | 188 | 0  | 1     |
| IAD39139 | 429041 | DNAH5 | chr5  | 13769604 | 13769729 | 1 | 126 | 126 | 0  | 1     |
| IAD39139 | 429054 | DNAH5 | chr5  | 13770852 | 13771094 | 3 | 243 | 243 | 0  | 1     |
| IAD39139 | 429067 | DNAH5 | chr5  | 13776542 | 13776820 | 2 | 279 | 279 | 0  | 1     |
| IAD39139 | 429085 | DNAH5 | chr5  | 13777305 | 13777469 | 2 | 165 | 165 | 0  | 1     |
| IAD39139 | 429049 | DNAH5 | chr5  | 13780932 | 13781073 | 2 | 142 | 142 | 0  | 1     |
| IAD39139 | 429024 | DNAH5 | chr5  | 13786282 | 13786465 | 2 | 184 | 184 | 0  | 1     |
| IAD39139 | 429016 | DNAH5 | chr5  | 13788819 | 13789028 | 2 | 210 | 195 | 15 | 0.929 |
| IAD39139 | 429045 | DNAH5 | chr5  | 13792097 | 13792331 | 3 | 235 | 235 | 0  | 1     |
| IAD39139 | 429055 | DNAH5 | chr5  | 13793618 | 13793842 | 2 | 225 | 225 | 0  | 1     |
| IAD39139 | 429037 | DNAH5 | chr5  | 13794039 | 13794172 | 2 | 134 | 134 | 0  | 1     |
| IAD39139 | 429019 | DNAH5 | chr5  | 13807694 | 13807839 | 1 | 146 | 133 | 13 | 0.911 |
| IAD39139 | 429058 | DNAH5 | chr5  | 13809147 | 13809300 | 1 | 154 | 154 | 0  | 1     |
| IAD39139 | 429091 | DNAH5 | chr5  | 13810162 | 13810374 | 2 | 213 | 213 | 0  | 1     |

|          |        |       |      |          |          |    |      |      |    |       |
|----------|--------|-------|------|----------|----------|----|------|------|----|-------|
| IAD39139 | 429070 | DNAH5 | chr5 | 13811750 | 13811937 | 2  | 188  | 188  | 0  | 1     |
| IAD39139 | 429065 | DNAH5 | chr5 | 13814708 | 13814960 | 2  | 253  | 253  | 0  | 1     |
| IAD39139 | 429053 | DNAH5 | chr5 | 13817651 | 13817808 | 2  | 158  | 158  | 0  | 1     |
| IAD39139 | 429030 | DNAH5 | chr5 | 13820449 | 13820613 | 2  | 165  | 165  | 0  | 1     |
| IAD39139 | 429064 | DNAH5 | chr5 | 13823366 | 13823484 | 2  | 119  | 119  | 0  | 1     |
| IAD39139 | 429028 | DNAH5 | chr5 | 13824302 | 13824447 | 2  | 146  | 146  | 0  | 1     |
| IAD39139 | 429026 | DNAH5 | chr5 | 13829613 | 13829818 | 2  | 206  | 206  | 0  | 1     |
| IAD39139 | 429078 | DNAH5 | chr5 | 13830129 | 13830327 | 2  | 199  | 199  | 0  | 1     |
| IAD39139 | 429092 | DNAH5 | chr5 | 13830700 | 13830889 | 2  | 190  | 190  | 0  | 1     |
| IAD39139 | 429088 | DNAH5 | chr5 | 13839459 | 13839642 | 2  | 184  | 184  | 0  | 1     |
| IAD39139 | 429084 | DNAH5 | chr5 | 13841009 | 13841244 | 2  | 236  | 236  | 0  | 1     |
| IAD39139 | 429039 | DNAH5 | chr5 | 13841795 | 13842018 | 3  | 224  | 214  | 10 | 0.955 |
| IAD39139 | 429063 | DNAH5 | chr5 | 13844940 | 13845107 | 2  | 168  | 168  | 0  | 1     |
| IAD39139 | 429048 | DNAH5 | chr5 | 13850755 | 13850929 | 2  | 175  | 175  | 0  | 1     |
| IAD39139 | 429038 | DNAH5 | chr5 | 13859555 | 13859719 | 2  | 165  | 165  | 0  | 1     |
| IAD39139 | 429060 | DNAH5 | chr5 | 13862651 | 13862861 | 3  | 211  | 211  | 0  | 1     |
| IAD39139 | 429022 | DNAH5 | chr5 | 13864500 | 13864751 | 2  | 252  | 252  | 0  | 1     |
| IAD39139 | 429075 | DNAH5 | chr5 | 13865771 | 13866020 | 2  | 250  | 250  | 0  | 1     |
| IAD39139 | 429090 | DNAH5 | chr5 | 13866323 | 13866396 | 2  | 74   | 74   | 0  | 1     |
| IAD39139 | 429083 | DNAH5 | chr5 | 13867877 | 13868106 | 2  | 230  | 230  | 0  | 1     |
| IAD39139 | 429025 | DNAH5 | chr5 | 13870870 | 13871116 | 3  | 247  | 247  | 0  | 1     |
| IAD39139 | 429035 | DNAH5 | chr5 | 13871667 | 13871879 | 2  | 213  | 213  | 0  | 1     |
| IAD39139 | 429043 | DNAH5 | chr5 | 13876787 | 13876931 | 1  | 145  | 145  | 0  | 1     |
| IAD39139 | 429015 | DNAH5 | chr5 | 13882831 | 13882929 | 1  | 99   | 99   | 0  | 1     |
| IAD39139 | 429071 | DNAH5 | chr5 | 13883007 | 13883208 | 2  | 202  | 202  | 0  | 1     |
| IAD39139 | 429018 | DNAH5 | chr5 | 13885092 | 13885342 | 3  | 251  | 240  | 11 | 0.956 |
| IAD39139 | 429066 | DNAH5 | chr5 | 13886067 | 13886243 | 2  | 177  | 177  | 0  | 1     |
| IAD39139 | 429021 | DNAH5 | chr5 | 13891079 | 13891235 | 2  | 157  | 157  | 0  | 1     |
| IAD39139 | 429056 | DNAH5 | chr5 | 13894753 | 13894935 | 2  | 183  | 183  | 0  | 1     |
| IAD39139 | 429051 | DNAH5 | chr5 | 13900309 | 13900526 | 2  | 218  | 218  | 0  | 1     |
| IAD39139 | 429036 | DNAH5 | chr5 | 13901355 | 13901687 | 3  | 333  | 299  | 34 | 0.898 |
| IAD39139 | 429040 | DNAH5 | chr5 | 13902156 | 13902252 | 1  | 97   | 78   | 19 | 0.804 |
| IAD39139 | 429059 | DNAH5 | chr5 | 13911489 | 13911607 | 2  | 119  | 119  | 0  | 1     |
| IAD39139 | 429068 | DNAH5 | chr5 | 13913846 | 13914072 | 2  | 227  | 199  | 28 | 0.877 |
| IAD39139 | 429069 | DNAH5 | chr5 | 13914623 | 13914756 | 2  | 134  | 134  | 0  | 1     |
| IAD39139 | 429074 | DNAH5 | chr5 | 13916451 | 13916569 | 2  | 119  | 119  | 0  | 1     |
| IAD39139 | 429020 | DNAH5 | chr5 | 13917246 | 13917370 | 2  | 125  | 125  | 0  | 1     |
| IAD39139 | 429032 | DNAH5 | chr5 | 13919279 | 13919466 | 3  | 188  | 188  | 0  | 1     |
| IAD39139 | 429081 | DNAH5 | chr5 | 13920583 | 13920731 | 1  | 149  | 149  | 0  | 1     |
| IAD39139 | 429023 | DNAH5 | chr5 | 13922210 | 13922442 | 2  | 233  | 233  | 0  | 1     |
| IAD39139 | 429042 | DNAH5 | chr5 | 13923383 | 13923554 | 2  | 172  | 172  | 0  | 1     |
| IAD39139 | 429027 | DNAH5 | chr5 | 13928197 | 13928292 | 2  | 96   | 96   | 0  | 1     |
| IAD39139 | 429077 | DNAH5 | chr5 | 13931213 | 13931358 | 1  | 146  | 146  | 0  | 1     |
| IAD39139 | 429050 | DNAH5 | chr5 | 13944485 | 13944552 | 1  | 68   | 68   | 0  | 1     |
| IAD39139 | 443125 | SPEN  | chr1 | 16174557 | 16174650 | 2  | 94   | 94   | 0  | 1     |
| IAD39139 | 443126 | SPEN  | chr1 | 16199305 | 16199636 | 3  | 332  | 332  | 0  | 1     |
| IAD39139 | 443123 | SPEN  | chr1 | 16202691 | 16203178 | 4  | 488  | 488  | 0  | 1     |
| IAD39139 | 443130 | SPEN  | chr1 | 16235810 | 16235981 | 2  | 172  | 172  | 0  | 1     |
| IAD39139 | 443127 | SPEN  | chr1 | 16237590 | 16237801 | 2  | 212  | 187  | 25 | 0.882 |
| IAD39139 | 443119 | SPEN  | chr1 | 16242617 | 16242779 | 2  | 163  | 163  | 0  | 1     |
| IAD39139 | 443120 | SPEN  | chr1 | 16245415 | 16245551 | 2  | 137  | 128  | 9  | 0.934 |
| IAD39139 | 443117 | SPEN  | chr1 | 16245893 | 16246017 | 2  | 125  | 125  | 0  | 1     |
| IAD39139 | 443116 | SPEN  | chr1 | 16247359 | 16247483 | 1  | 125  | 125  | 0  | 1     |
| IAD39139 | 443118 | SPEN  | chr1 | 16248738 | 16248849 | 1  | 112  | 86   | 26 | 0.768 |
| IAD39139 | 443124 | SPEN  | chr1 | 16254580 | 16262766 | 55 | 8187 | 8187 | 0  | 1     |
| IAD39139 | 443129 | SPEN  | chr1 | 16263652 | 16264145 | 4  | 494  | 494  | 0  | 1     |
| IAD39139 | 443128 | SPEN  | chr1 | 16264301 | 16264506 | 2  | 206  | 206  | 0  | 1     |
| IAD39139 | 443121 | SPEN  | chr1 | 16265207 | 16265376 | 2  | 170  | 170  | 0  | 1     |
| IAD39139 | 443122 | SPEN  | chr1 | 16265785 | 16265927 | 1  | 143  | 143  | 0  | 1     |
| IAD39139 | 613113 | NBPF1 | chr1 | 16890432 | 16890686 | 2  | 255  | 255  | 0  | 1     |
| IAD39139 | 613118 | NBPF1 | chr1 | 16891296 | 16891418 | 1  | 123  | 123  | 0  | 1     |

|          |        |       |       |          |          |   |     |     |     |       |
|----------|--------|-------|-------|----------|----------|---|-----|-----|-----|-------|
| IAD39139 | 613110 | NBPF1 | chr1  | 16892122 | 16892309 | 2 | 188 | 188 | 0   | 1     |
| IAD39139 | 613126 | NBPF1 | chr1  | 16892896 | 16892959 | 1 | 64  | 64  | 0   | 1     |
| IAD39139 | 613131 | NBPF1 | chr1  | 16893668 | 16893851 | 2 | 184 | 184 | 0   | 1     |
| IAD39139 | 613128 | NBPF1 | chr1  | 16894468 | 16894530 | 1 | 63  | 63  | 0   | 1     |
| IAD39139 | 613120 | NBPF1 | chr1  | 16895562 | 16895736 | 2 | 175 | 175 | 0   | 1     |
| IAD39139 | 613121 | NBPF1 | chr1  | 16899631 | 16899693 | 0 | 63  | 0   | 63  | 0     |
| IAD39139 | 613125 | NBPF1 | chr1  | 16900976 | 16901192 | 2 | 217 | 205 | 12  | 0.945 |
| IAD39139 | 613111 | NBPF1 | chr1  | 16901646 | 16901729 | 1 | 84  | 84  | 0   | 1     |
| IAD39139 | 613124 | NBPF1 | chr1  | 16902756 | 16902981 | 2 | 226 | 226 | 0   | 1     |
| IAD39139 | 613114 | NBPF1 | chr1  | 16903806 | 16903919 | 1 | 114 | 114 | 0   | 1     |
| IAD39139 | 613130 | NBPF1 | chr1  | 16905682 | 16905902 | 1 | 221 | 33  | 188 | 0.149 |
| IAD39139 | 613119 | NBPF1 | chr1  | 16907234 | 16907456 | 2 | 223 | 223 | 0   | 1     |
| IAD39139 | 613127 | NBPF1 | chr1  | 16907909 | 16907992 | 1 | 84  | 84  | 0   | 1     |
| IAD39139 | 613117 | NBPF1 | chr1  | 16909033 | 16909258 | 2 | 226 | 141 | 85  | 0.624 |
| IAD39139 | 613116 | NBPF1 | chr1  | 16910083 | 16910196 | 1 | 114 | 114 | 0   | 1     |
| IAD39139 | 613132 | NBPF1 | chr1  | 16911978 | 16912198 | 2 | 221 | 100 | 121 | 0.452 |
| IAD39139 | 613112 | NBPF1 | chr1  | 16913539 | 16913761 | 2 | 223 | 223 | 0   | 1     |
| IAD39139 | 613115 | NBPF1 | chr1  | 16914214 | 16914297 | 1 | 84  | 84  | 0   | 1     |
| IAD39139 | 613122 | NBPF1 | chr1  | 16915338 | 16915563 | 2 | 226 | 141 | 85  | 0.624 |
| IAD39139 | 613123 | NBPF1 | chr1  | 16916388 | 16916501 | 1 | 114 | 98  | 16  | 0.86  |
| IAD39139 | 613129 | NBPF1 | chr1  | 16918336 | 16918521 | 2 | 186 | 186 | 0   | 1     |
| IAD39139 | 599880 | PSMB5 | chr14 | 23495292 | 23495589 | 2 | 298 | 298 | 0   | 1     |
| IAD39139 | 599879 | PSMB5 | chr14 | 23495557 | 23495589 | 1 | 33  | 33  | 0   | 1     |
| IAD39139 | 599881 | PSMB5 | chr14 | 23496948 | 23497043 | 1 | 96  | 72  | 24  | 0.75  |
| IAD39139 | 599882 | PSMB5 | chr14 | 23502571 | 23502777 | 2 | 207 | 207 | 0   | 1     |
| IAD39139 | 599877 | PSMB5 | chr14 | 23502571 | 23502888 | 3 | 318 | 318 | 0   | 1     |
| IAD39139 | 599878 | PSMB5 | chr14 | 23503887 | 23504095 | 2 | 209 | 209 | 0   | 1     |
| IAD39139 | 422983 | KRAS  | chr12 | 25362723 | 25362850 | 1 | 128 | 128 | 0   | 1     |
| IAD39139 | 422981 | KRAS  | chr12 | 25368369 | 25368499 | 1 | 131 | 131 | 0   | 1     |
| IAD39139 | 422980 | KRAS  | chr12 | 25378542 | 25378712 | 2 | 171 | 171 | 0   | 1     |
| IAD39139 | 422982 | KRAS  | chr12 | 25380162 | 25380351 | 2 | 190 | 184 | 6   | 0.968 |
| IAD39139 | 422984 | KRAS  | chr12 | 25398202 | 25398323 | 2 | 122 | 122 | 0   | 1     |
| IAD39139 | 463329 | XBP1  | chr22 | 29191157 | 29191725 | 5 | 569 | 569 | 0   | 1     |
| IAD39139 | 463325 | XBP1  | chr22 | 29191528 | 29191725 | 3 | 198 | 198 | 0   | 1     |
| IAD39139 | 463332 | XBP1  | chr22 | 29192029 | 29192116 | 1 | 88  | 88  | 0   | 1     |
| IAD39139 | 463331 | XBP1  | chr22 | 29192029 | 29192185 | 1 | 157 | 157 | 0   | 1     |
| IAD39139 | 463330 | XBP1  | chr22 | 29192132 | 29192185 | 1 | 54  | 54  | 0   | 1     |
| IAD39139 | 463328 | XBP1  | chr22 | 29193059 | 29193198 | 2 | 140 | 140 | 0   | 1     |
| IAD39139 | 463326 | XBP1  | chr22 | 29195039 | 29195146 | 1 | 108 | 108 | 0   | 1     |
| IAD39139 | 463327 | XBP1  | chr22 | 29196280 | 29196517 | 3 | 238 | 225 | 13  | 0.945 |
| IAD39139 | 617611 | LTN1  | chr21 | 30302764 | 30302837 | 1 | 74  | 44  | 30  | 0.595 |
| IAD39139 | 617613 | LTN1  | chr21 | 30303471 | 30303649 | 2 | 179 | 163 | 16  | 0.911 |
| IAD39139 | 617615 | LTN1  | chr21 | 30304786 | 30304991 | 3 | 206 | 206 | 0   | 1     |
| IAD39139 | 617618 | LTN1  | chr21 | 30307425 | 30307656 | 3 | 232 | 211 | 21  | 0.909 |
| IAD39139 | 617628 | LTN1  | chr21 | 30308842 | 30309024 | 2 | 183 | 183 | 0   | 1     |
| IAD39139 | 617609 | LTN1  | chr21 | 30313536 | 30313733 | 2 | 198 | 198 | 0   | 1     |
| IAD39139 | 617608 | LTN1  | chr21 | 30315578 | 30315663 | 1 | 86  | 86  | 0   | 1     |
| IAD39139 | 617636 | LTN1  | chr21 | 30315983 | 30316231 | 2 | 249 | 249 | 0   | 1     |
| IAD39139 | 617635 | LTN1  | chr21 | 30316699 | 30316923 | 2 | 225 | 225 | 0   | 1     |
| IAD39139 | 617632 | LTN1  | chr21 | 30318123 | 30318278 | 2 | 156 | 135 | 21  | 0.865 |
| IAD39139 | 617627 | LTN1  | chr21 | 30318468 | 30318614 | 2 | 147 | 126 | 21  | 0.857 |
| IAD39139 | 617617 | LTN1  | chr21 | 30319780 | 30319933 | 2 | 154 | 154 | 0   | 1     |
| IAD39139 | 617631 | LTN1  | chr21 | 30324476 | 30324591 | 2 | 116 | 116 | 0   | 1     |
| IAD39139 | 617620 | LTN1  | chr21 | 30325533 | 30325703 | 2 | 171 | 171 | 0   | 1     |
| IAD39139 | 617625 | LTN1  | chr21 | 30329078 | 30329275 | 2 | 198 | 157 | 41  | 0.793 |
| IAD39139 | 617634 | LTN1  | chr21 | 30329648 | 30329803 | 2 | 156 | 129 | 27  | 0.827 |
| IAD39139 | 617624 | LTN1  | chr21 | 30330702 | 30330866 | 2 | 165 | 165 | 0   | 1     |
| IAD39139 | 617630 | LTN1  | chr21 | 30331774 | 30332024 | 2 | 251 | 210 | 41  | 0.837 |
| IAD39139 | 617619 | LTN1  | chr21 | 30332833 | 30333033 | 2 | 201 | 201 | 0   | 1     |
| IAD39139 | 617623 | LTN1  | chr21 | 30338181 | 30338233 | 1 | 53  | 27  | 26  | 0.509 |
| IAD39139 | 617616 | LTN1  | chr21 | 30338686 | 30339506 | 6 | 821 | 809 | 12  | 0.985 |

|          |        |       |       |          |          |   |      |      |    |       |
|----------|--------|-------|-------|----------|----------|---|------|------|----|-------|
| IAD39139 | 617633 | LTN1  | chr21 | 30341782 | 30341928 | 2 | 147  | 147  | 0  | 1     |
| IAD39139 | 617637 | LTN1  | chr21 | 30342868 | 30343069 | 2 | 202  | 154  | 48 | 0.762 |
| IAD39139 | 617622 | LTN1  | chr21 | 30343587 | 30343771 | 2 | 185  | 185  | 0  | 1     |
| IAD39139 | 617610 | LTN1  | chr21 | 30353435 | 30353626 | 2 | 192  | 119  | 73 | 0.62  |
| IAD39139 | 617626 | LTN1  | chr21 | 30354632 | 30354695 | 1 | 64   | 49   | 15 | 0.766 |
| IAD39139 | 617612 | LTN1  | chr21 | 30357007 | 30357248 | 3 | 242  | 235  | 7  | 0.971 |
| IAD39139 | 617614 | LTN1  | chr21 | 30358454 | 30358563 | 1 | 110  | 57   | 53 | 0.518 |
| IAD39139 | 617629 | LTN1  | chr21 | 30359046 | 30359260 | 2 | 215  | 193  | 22 | 0.898 |
| IAD39139 | 617621 | LTN1  | chr21 | 30365079 | 30365269 | 2 | 191  | 191  | 0  | 1     |
| IAD39139 | 614627 | TIAM1 | chr21 | 32492680 | 32493160 | 3 | 481  | 472  | 9  | 0.981 |
| IAD39139 | 614619 | TIAM1 | chr21 | 32496834 | 32497017 | 2 | 184  | 184  | 0  | 1     |
| IAD39139 | 614628 | TIAM1 | chr21 | 32499377 | 32499475 | 1 | 99   | 99   | 0  | 1     |
| IAD39139 | 614636 | TIAM1 | chr21 | 32502525 | 32502638 | 1 | 114  | 114  | 0  | 1     |
| IAD39139 | 614626 | TIAM1 | chr21 | 32503202 | 32503271 | 1 | 70   | 70   | 0  | 1     |
| IAD39139 | 614625 | TIAM1 | chr21 | 32508245 | 32508364 | 1 | 120  | 120  | 0  | 1     |
| IAD39139 | 614621 | TIAM1 | chr21 | 32513430 | 32513559 | 2 | 130  | 130  | 0  | 1     |
| IAD39139 | 614631 | TIAM1 | chr21 | 32513637 | 32513827 | 2 | 191  | 191  | 0  | 1     |
| IAD39139 | 614630 | TIAM1 | chr21 | 32519207 | 32519326 | 1 | 120  | 120  | 0  | 1     |
| IAD39139 | 614622 | TIAM1 | chr21 | 32524948 | 32525084 | 1 | 137  | 137  | 0  | 1     |
| IAD39139 | 614637 | TIAM1 | chr21 | 32525378 | 32525457 | 1 | 80   | 80   | 0  | 1     |
| IAD39139 | 614638 | TIAM1 | chr21 | 32526559 | 32526749 | 2 | 191  | 191  | 0  | 1     |
| IAD39139 | 614629 | TIAM1 | chr21 | 32537273 | 32537387 | 1 | 115  | 115  | 0  | 1     |
| IAD39139 | 614620 | TIAM1 | chr21 | 32554732 | 32554967 | 2 | 236  | 236  | 0  | 1     |
| IAD39139 | 614634 | TIAM1 | chr21 | 32559311 | 32559408 | 1 | 98   | 98   | 0  | 1     |
| IAD39139 | 614635 | TIAM1 | chr21 | 32567534 | 32567626 | 2 | 93   | 93   | 0  | 1     |
| IAD39139 | 614624 | TIAM1 | chr21 | 32575218 | 32575333 | 1 | 116  | 116  | 0  | 1     |
| IAD39139 | 614618 | TIAM1 | chr21 | 32582355 | 32582536 | 2 | 182  | 182  | 0  | 1     |
| IAD39139 | 614633 | TIAM1 | chr21 | 32585708 | 32585793 | 1 | 86   | 86   | 0  | 1     |
| IAD39139 | 614615 | TIAM1 | chr21 | 32589863 | 32590020 | 1 | 158  | 158  | 0  | 1     |
| IAD39139 | 614616 | TIAM1 | chr21 | 32595716 | 32595912 | 2 | 197  | 195  | 2  | 0.99  |
| IAD39139 | 614614 | TIAM1 | chr21 | 32598036 | 32598271 | 2 | 236  | 236  | 0  | 1     |
| IAD39139 | 614617 | TIAM1 | chr21 | 32617798 | 32617981 | 2 | 184  | 184  | 0  | 1     |
| IAD39139 | 614623 | TIAM1 | chr21 | 32624052 | 32624510 | 4 | 459  | 459  | 0  | 1     |
| IAD39139 | 614632 | TIAM1 | chr21 | 32638320 | 32639293 | 7 | 974  | 974  | 0  | 1     |
| IAD39139 | 614599 | HECW1 | chr7  | 43283499 | 43283536 | 1 | 38   | 38   | 0  | 1     |
| IAD39139 | 614600 | HECW1 | chr7  | 43351356 | 43351691 | 3 | 336  | 336  | 0  | 1     |
| IAD39139 | 614595 | HECW1 | chr7  | 43360228 | 43360346 | 1 | 119  | 119  | 0  | 1     |
| IAD39139 | 614588 | HECW1 | chr7  | 43400479 | 43400584 | 1 | 106  | 106  | 0  | 1     |
| IAD39139 | 614583 | HECW1 | chr7  | 43436407 | 43436493 | 1 | 87   | 87   | 0  | 1     |
| IAD39139 | 614582 | HECW1 | chr7  | 43447155 | 43447335 | 2 | 181  | 181  | 0  | 1     |
| IAD39139 | 614598 | HECW1 | chr7  | 43477596 | 43477749 | 2 | 154  | 154  | 0  | 1     |
| IAD39139 | 614591 | HECW1 | chr7  | 43482122 | 43482233 | 1 | 112  | 112  | 0  | 1     |
| IAD39139 | 614586 | HECW1 | chr7  | 43483811 | 43485174 | 9 | 1364 | 1364 | 0  | 1     |
| IAD39139 | 614587 | HECW1 | chr7  | 43490421 | 43490533 | 1 | 113  | 113  | 0  | 1     |
| IAD39139 | 614589 | HECW1 | chr7  | 43495890 | 43496051 | 2 | 162  | 162  | 0  | 1     |
| IAD39139 | 614594 | HECW1 | chr7  | 43503253 | 43503403 | 1 | 151  | 151  | 0  | 1     |
| IAD39139 | 614584 | HECW1 | chr7  | 43506040 | 43506172 | 1 | 133  | 133  | 0  | 1     |
| IAD39139 | 614590 | HECW1 | chr7  | 43508513 | 43508709 | 2 | 197  | 197  | 0  | 1     |
| IAD39139 | 614592 | HECW1 | chr7  | 43519203 | 43519348 | 1 | 146  | 146  | 0  | 1     |
| IAD39139 | 614601 | HECW1 | chr7  | 43531668 | 43531784 | 1 | 117  | 115  | 2  | 0.983 |
| IAD39139 | 614580 | HECW1 | chr7  | 43532677 | 43532784 | 1 | 108  | 108  | 0  | 1     |
| IAD39139 | 614585 | HECW1 | chr7  | 43540292 | 43540386 | 1 | 95   | 95   | 0  | 1     |
| IAD39139 | 614593 | HECW1 | chr7  | 43540806 | 43540926 | 1 | 121  | 121  | 0  | 1     |
| IAD39139 | 614577 | HECW1 | chr7  | 43546730 | 43546861 | 1 | 132  | 128  | 4  | 0.97  |
| IAD39139 | 614597 | HECW1 | chr7  | 43547611 | 43547735 | 1 | 125  | 125  | 0  | 1     |
| IAD39139 | 614579 | HECW1 | chr7  | 43548562 | 43548725 | 2 | 164  | 164  | 0  | 1     |
| IAD39139 | 614576 | HECW1 | chr7  | 43580756 | 43580865 | 1 | 110  | 110  | 0  | 1     |
| IAD39139 | 614578 | HECW1 | chr7  | 43581462 | 43581602 | 1 | 141  | 141  | 0  | 1     |
| IAD39139 | 614596 | HECW1 | chr7  | 43590038 | 43590195 | 1 | 158  | 158  | 0  | 1     |
| IAD39139 | 614603 | HECW1 | chr7  | 43591815 | 43591940 | 1 | 126  | 126  | 0  | 1     |
| IAD39139 | 614602 | HECW1 | chr7  | 43594185 | 43594394 | 2 | 210  | 204  | 6  | 0.971 |

|          |        |       |      |          |          |   |     |     |    |       |
|----------|--------|-------|------|----------|----------|---|-----|-----|----|-------|
| IAD39139 | 614581 | HECW1 | chr7 | 43601408 | 43601530 | 1 | 123 | 123 | 0  | 1     |
| IAD39139 | 617660 | FRYL  | chr4 | 48501433 | 48501702 | 3 | 270 | 270 | 0  | 1     |
| IAD39139 | 617670 | FRYL  | chr4 | 48502041 | 48502242 | 2 | 202 | 202 | 0  | 1     |
| IAD39139 | 617676 | FRYL  | chr4 | 48503634 | 48503755 | 2 | 122 | 122 | 0  | 1     |
| IAD39139 | 617693 | FRYL  | chr4 | 48504839 | 48504867 | 1 | 29  | 29  | 0  | 1     |
| IAD39139 | 617658 | FRYL  | chr4 | 48507558 | 48507637 | 1 | 80  | 80  | 0  | 1     |
| IAD39139 | 617666 | FRYL  | chr4 | 48512070 | 48512179 | 1 | 110 | 110 | 0  | 1     |
| IAD39139 | 617675 | FRYL  | chr4 | 48512846 | 48513006 | 2 | 161 | 161 | 0  | 1     |
| IAD39139 | 617681 | FRYL  | chr4 | 48514492 | 48514710 | 3 | 219 | 196 | 23 | 0.895 |
| IAD39139 | 617683 | FRYL  | chr4 | 48517039 | 48517297 | 2 | 259 | 251 | 8  | 0.969 |
| IAD39139 | 617694 | FRYL  | chr4 | 48523059 | 48523237 | 2 | 179 | 179 | 0  | 1     |
| IAD39139 | 617651 | FRYL  | chr4 | 48524912 | 48525126 | 2 | 215 | 215 | 0  | 1     |
| IAD39139 | 617657 | FRYL  | chr4 | 48529488 | 48529675 | 3 | 188 | 188 | 0  | 1     |
| IAD39139 | 617669 | FRYL  | chr4 | 48529982 | 48530067 | 2 | 86  | 50  | 36 | 0.581 |
| IAD39139 | 617642 | FRYL  | chr4 | 48530186 | 48530358 | 2 | 173 | 173 | 0  | 1     |
| IAD39139 | 617659 | FRYL  | chr4 | 48533167 | 48533375 | 2 | 209 | 209 | 0  | 1     |
| IAD39139 | 617641 | FRYL  | chr4 | 48536556 | 48536707 | 2 | 152 | 103 | 49 | 0.678 |
| IAD39139 | 617689 | FRYL  | chr4 | 48537668 | 48537849 | 2 | 182 | 157 | 25 | 0.863 |
| IAD39139 | 617649 | FRYL  | chr4 | 48541982 | 48542090 | 3 | 109 | 109 | 0  | 1     |
| IAD39139 | 617684 | FRYL  | chr4 | 48542364 | 48542982 | 5 | 619 | 619 | 0  | 1     |
| IAD39139 | 617688 | FRYL  | chr4 | 48544038 | 48544143 | 1 | 106 | 106 | 0  | 1     |
| IAD39139 | 617650 | FRYL  | chr4 | 48545818 | 48546019 | 2 | 202 | 202 | 0  | 1     |
| IAD39139 | 617656 | FRYL  | chr4 | 48546794 | 48546926 | 2 | 133 | 133 | 0  | 1     |
| IAD39139 | 617678 | FRYL  | chr4 | 48548078 | 48548293 | 2 | 216 | 216 | 0  | 1     |
| IAD39139 | 617692 | FRYL  | chr4 | 48549595 | 48549791 | 2 | 197 | 148 | 49 | 0.751 |
| IAD39139 | 617654 | FRYL  | chr4 | 48550701 | 48550815 | 2 | 115 | 115 | 0  | 1     |
| IAD39139 | 617691 | FRYL  | chr4 | 48551484 | 48551645 | 2 | 162 | 162 | 0  | 1     |
| IAD39139 | 617680 | FRYL  | chr4 | 48552603 | 48552726 | 3 | 124 | 124 | 0  | 1     |
| IAD39139 | 617673 | FRYL  | chr4 | 48553505 | 48553600 | 1 | 96  | 96  | 0  | 1     |
| IAD39139 | 617663 | FRYL  | chr4 | 48555226 | 48555405 | 2 | 180 | 180 | 0  | 1     |
| IAD39139 | 617679 | FRYL  | chr4 | 48558989 | 48559140 | 2 | 152 | 139 | 13 | 0.914 |
| IAD39139 | 617646 | FRYL  | chr4 | 48559464 | 48559734 | 2 | 271 | 271 | 0  | 1     |
| IAD39139 | 617662 | FRYL  | chr4 | 48563479 | 48563658 | 3 | 180 | 180 | 0  | 1     |
| IAD39139 | 617653 | FRYL  | chr4 | 48564900 | 48565010 | 2 | 111 | 111 | 0  | 1     |
| IAD39139 | 617645 | FRYL  | chr4 | 48565959 | 48566124 | 2 | 166 | 151 | 15 | 0.91  |
| IAD39139 | 617674 | FRYL  | chr4 | 48566944 | 48567065 | 2 | 122 | 122 | 0  | 1     |
| IAD39139 | 617665 | FRYL  | chr4 | 48567542 | 48567713 | 2 | 172 | 109 | 63 | 0.634 |
| IAD39139 | 617652 | FRYL  | chr4 | 48569259 | 48569442 | 2 | 184 | 169 | 15 | 0.918 |
| IAD39139 | 617677 | FRYL  | chr4 | 48572838 | 48572940 | 1 | 103 | 103 | 0  | 1     |
| IAD39139 | 617644 | FRYL  | chr4 | 48575197 | 48575265 | 1 | 69  | 69  | 0  | 1     |
| IAD39139 | 617661 | FRYL  | chr4 | 48577128 | 48577263 | 2 | 136 | 136 | 0  | 1     |
| IAD39139 | 617695 | FRYL  | chr4 | 48578041 | 48578244 | 2 | 204 | 204 | 0  | 1     |
| IAD39139 | 617668 | FRYL  | chr4 | 48580984 | 48581263 | 3 | 280 | 262 | 18 | 0.936 |
| IAD39139 | 617647 | FRYL  | chr4 | 48582876 | 48582973 | 1 | 98  | 98  | 0  | 1     |
| IAD39139 | 617640 | FRYL  | chr4 | 48583431 | 48583627 | 2 | 197 | 197 | 0  | 1     |
| IAD39139 | 617687 | FRYL  | chr4 | 48584508 | 48584756 | 3 | 249 | 249 | 0  | 1     |
| IAD39139 | 617672 | FRYL  | chr4 | 48588632 | 48588750 | 2 | 119 | 119 | 0  | 1     |
| IAD39139 | 617690 | FRYL  | chr4 | 48591756 | 48591899 | 1 | 144 | 85  | 59 | 0.59  |
| IAD39139 | 617667 | FRYL  | chr4 | 48592670 | 48592852 | 3 | 183 | 183 | 0  | 1     |
| IAD39139 | 617639 | FRYL  | chr4 | 48595941 | 48596038 | 0 | 98  | 0   | 98 | 0     |
| IAD39139 | 617698 | FRYL  | chr4 | 48597601 | 48597720 | 2 | 120 | 112 | 8  | 0.933 |
| IAD39139 | 617638 | FRYL  | chr4 | 48597908 | 48598022 | 1 | 115 | 107 | 8  | 0.93  |
| IAD39139 | 617697 | FRYL  | chr4 | 48604031 | 48604143 | 1 | 113 | 113 | 0  | 1     |
| IAD39139 | 617648 | FRYL  | chr4 | 48605301 | 48605410 | 2 | 110 | 110 | 0  | 1     |
| IAD39139 | 617686 | FRYL  | chr4 | 48607752 | 48607855 | 2 | 104 | 104 | 0  | 1     |
| IAD39139 | 617643 | FRYL  | chr4 | 48608449 | 48608628 | 2 | 180 | 180 | 0  | 1     |
| IAD39139 | 617682 | FRYL  | chr4 | 48610998 | 48611089 | 1 | 92  | 65  | 27 | 0.707 |
| IAD39139 | 617671 | FRYL  | chr4 | 48611755 | 48611845 | 1 | 91  | 65  | 26 | 0.714 |
| IAD39139 | 617664 | FRYL  | chr4 | 48621285 | 48621392 | 2 | 108 | 108 | 0  | 1     |
| IAD39139 | 617655 | FRYL  | chr4 | 48622650 | 48622800 | 2 | 151 | 151 | 0  | 1     |
| IAD39139 | 617685 | FRYL  | chr4 | 48625137 | 48625201 | 2 | 65  | 65  | 0  | 1     |

|          |        |      |       |          |          |   |     |     |    |       |
|----------|--------|------|-------|----------|----------|---|-----|-----|----|-------|
| IAD39139 | 617696 | FRYL | chr4  | 48636302 | 48636432 | 2 | 131 | 131 | 0  | 1     |
| IAD39139 | 430975 | RB1  | chr13 | 48878043 | 48878190 | 3 | 148 | 148 | 0  | 1     |
| IAD39139 | 430983 | RB1  | chr13 | 48881410 | 48881547 | 2 | 138 | 117 | 21 | 0.848 |
| IAD39139 | 430979 | RB1  | chr13 | 48916729 | 48916855 | 2 | 127 | 127 | 0  | 1     |
| IAD39139 | 430992 | RB1  | chr13 | 48919210 | 48919340 | 2 | 131 | 131 | 0  | 1     |
| IAD39139 | 430984 | RB1  | chr13 | 48921955 | 48922004 | 2 | 50  | 50  | 0  | 1     |
| IAD39139 | 430976 | RB1  | chr13 | 48923086 | 48923164 | 2 | 79  | 63  | 16 | 0.797 |
| IAD39139 | 430987 | RB1  | chr13 | 48934147 | 48934268 | 1 | 122 | 96  | 26 | 0.787 |
| IAD39139 | 430994 | RB1  | chr13 | 48936945 | 48937098 | 2 | 154 | 154 | 0  | 1     |
| IAD39139 | 430989 | RB1  | chr13 | 48939024 | 48939112 | 1 | 89  | 10  | 79 | 0.112 |
| IAD39139 | 430997 | RB1  | chr13 | 48941624 | 48941744 | 1 | 121 | 121 | 0  | 1     |
| IAD39139 | 430999 | RB1  | chr13 | 48942657 | 48942745 | 2 | 89  | 89  | 0  | 1     |
| IAD39139 | 430980 | RB1  | chr13 | 48947535 | 48947633 | 1 | 99  | 99  | 0  | 1     |
| IAD39139 | 431000 | RB1  | chr13 | 48951048 | 48951175 | 1 | 128 | 128 | 0  | 1     |
| IAD39139 | 431001 | RB1  | chr13 | 48953724 | 48953791 | 1 | 68  | 35  | 33 | 0.515 |
| IAD39139 | 430993 | RB1  | chr13 | 48954183 | 48954225 | 0 | 43  | 0   | 43 | 0     |
| IAD39139 | 430986 | RB1  | chr13 | 48954295 | 48954382 | 1 | 88  | 62  | 26 | 0.705 |
| IAD39139 | 430998 | RB1  | chr13 | 48955377 | 48955584 | 2 | 208 | 208 | 0  | 1     |
| IAD39139 | 430996 | RB1  | chr13 | 49027123 | 49027252 | 2 | 130 | 130 | 0  | 1     |
| IAD39139 | 430977 | RB1  | chr13 | 49030334 | 49030490 | 2 | 157 | 148 | 9  | 0.943 |
| IAD39139 | 430991 | RB1  | chr13 | 49033818 | 49033974 | 2 | 157 | 157 | 0  | 1     |
| IAD39139 | 430985 | RB1  | chr13 | 49037861 | 49037976 | 2 | 116 | 116 | 0  | 1     |
| IAD39139 | 430978 | RB1  | chr13 | 49039128 | 49039252 | 2 | 125 | 125 | 0  | 1     |
| IAD39139 | 430990 | RB1  | chr13 | 49039335 | 49039509 | 1 | 175 | 162 | 13 | 0.926 |
| IAD39139 | 430981 | RB1  | chr13 | 49047490 | 49047531 | 1 | 42  | 42  | 0  | 1     |
| IAD39139 | 430995 | RB1  | chr13 | 49050831 | 49050984 | 2 | 154 | 154 | 0  | 1     |
| IAD39139 | 430988 | RB1  | chr13 | 49051485 | 49051545 | 1 | 61  | 61  | 0  | 1     |
| IAD39139 | 430982 | RB1  | chr13 | 49054128 | 49054212 | 1 | 85  | 85  | 0  | 1     |
| IAD39139 | 438106 | CYLD | chr16 | 50783604 | 50784118 | 4 | 515 | 515 | 0  | 1     |
| IAD39139 | 438109 | CYLD | chr16 | 50785509 | 50785822 | 3 | 314 | 297 | 17 | 0.946 |
| IAD39139 | 438113 | CYLD | chr16 | 50788224 | 50788340 | 1 | 117 | 62  | 55 | 0.53  |
| IAD39139 | 438096 | CYLD | chr16 | 50788366 | 50788381 | 0 | 16  | 0   | 16 | 0     |
| IAD39139 | 438105 | CYLD | chr16 | 50810080 | 50810193 | 2 | 114 | 114 | 0  | 1     |
| IAD39139 | 438097 | CYLD | chr16 | 50810084 | 50810193 | 2 | 110 | 110 | 0  | 1     |
| IAD39139 | 438107 | CYLD | chr16 | 50811730 | 50811857 | 2 | 128 | 120 | 8  | 0.938 |
| IAD39139 | 438112 | CYLD | chr16 | 50813570 | 50813960 | 4 | 391 | 391 | 0  | 1     |
| IAD39139 | 438103 | CYLD | chr16 | 50815151 | 50815327 | 2 | 177 | 177 | 0  | 1     |
| IAD39139 | 438100 | CYLD | chr16 | 50816230 | 50816382 | 2 | 153 | 153 | 0  | 1     |
| IAD39139 | 438098 | CYLD | chr16 | 50818234 | 50818367 | 2 | 134 | 134 | 0  | 1     |
| IAD39139 | 438102 | CYLD | chr16 | 50820760 | 50820862 | 1 | 103 | 79  | 24 | 0.767 |
| IAD39139 | 438108 | CYLD | chr16 | 50821691 | 50821768 | 2 | 78  | 78  | 0  | 1     |
| IAD39139 | 438104 | CYLD | chr16 | 50825463 | 50825606 | 2 | 144 | 144 | 0  | 1     |
| IAD39139 | 438110 | CYLD | chr16 | 50826502 | 50826621 | 2 | 120 | 103 | 17 | 0.858 |
| IAD39139 | 438101 | CYLD | chr16 | 50827451 | 50827580 | 2 | 130 | 130 | 0  | 1     |
| IAD39139 | 438111 | CYLD | chr16 | 50828117 | 50828344 | 2 | 228 | 228 | 0  | 1     |
| IAD39139 | 438099 | CYLD | chr16 | 50830229 | 50830424 | 2 | 196 | 196 | 0  | 1     |
| IAD39139 | 425066 | EGFR | chr7  | 55086965 | 55087063 | 2 | 99  | 99  | 0  | 1     |
| IAD39139 | 425051 | EGFR | chr7  | 55209973 | 55210135 | 2 | 163 | 163 | 0  | 1     |
| IAD39139 | 425049 | EGFR | chr7  | 55210992 | 55211186 | 2 | 195 | 195 | 0  | 1     |
| IAD39139 | 425056 | EGFR | chr7  | 55214293 | 55214438 | 1 | 146 | 146 | 0  | 1     |
| IAD39139 | 425065 | EGFR | chr7  | 55218981 | 55219060 | 1 | 80  | 80  | 0  | 1     |
| IAD39139 | 425058 | EGFR | chr7  | 55220233 | 55220362 | 1 | 130 | 130 | 0  | 1     |
| IAD39139 | 425067 | EGFR | chr7  | 55221698 | 55221850 | 2 | 153 | 153 | 0  | 1     |
| IAD39139 | 425063 | EGFR | chr7  | 55223517 | 55223644 | 1 | 128 | 128 | 0  | 1     |
| IAD39139 | 425044 | EGFR | chr7  | 55224220 | 55224357 | 1 | 138 | 138 | 0  | 1     |
| IAD39139 | 425039 | EGFR | chr7  | 55224446 | 55224530 | 1 | 85  | 85  | 0  | 1     |
| IAD39139 | 425052 | EGFR | chr7  | 55224446 | 55224541 | 1 | 96  | 96  | 0  | 1     |
| IAD39139 | 425068 | EGFR | chr7  | 55225350 | 55225451 | 1 | 102 | 102 | 0  | 1     |
| IAD39139 | 425042 | EGFR | chr7  | 55227826 | 55228036 | 2 | 211 | 211 | 0  | 1     |
| IAD39139 | 425060 | EGFR | chr7  | 55229186 | 55229329 | 1 | 144 | 144 | 0  | 1     |
| IAD39139 | 425040 | EGFR | chr7  | 55231420 | 55231521 | 1 | 102 | 102 | 0  | 1     |

|          |        |         |       |          |          |   |     |     |   |       |
|----------|--------|---------|-------|----------|----------|---|-----|-----|---|-------|
| IAD39139 | 425057 | EGFR    | chr7  | 55232967 | 55233135 | 1 | 169 | 169 | 0 | 1     |
| IAD39139 | 425061 | EGFR    | chr7  | 55236210 | 55236227 | 1 | 18  | 18  | 0 | 1     |
| IAD39139 | 425053 | EGFR    | chr7  | 55237994 | 55238242 | 2 | 249 | 249 | 0 | 1     |
| IAD39139 | 425048 | EGFR    | chr7  | 55238862 | 55238911 | 1 | 50  | 50  | 0 | 1     |
| IAD39139 | 425047 | EGFR    | chr7  | 55240670 | 55240822 | 2 | 153 | 153 | 0 | 1     |
| IAD39139 | 425062 | EGFR    | chr7  | 55241608 | 55241741 | 2 | 134 | 134 | 0 | 1     |
| IAD39139 | 425064 | EGFR    | chr7  | 55242409 | 55242518 | 1 | 110 | 110 | 0 | 1     |
| IAD39139 | 425059 | EGFR    | chr7  | 55248980 | 55249176 | 2 | 197 | 197 | 0 | 1     |
| IAD39139 | 425043 | EGFR    | chr7  | 55259406 | 55259572 | 1 | 167 | 167 | 0 | 1     |
| IAD39139 | 425055 | EGFR    | chr7  | 55260453 | 55260539 | 1 | 87  | 87  | 0 | 1     |
| IAD39139 | 425045 | EGFR    | chr7  | 55266404 | 55266561 | 1 | 158 | 158 | 0 | 1     |
| IAD39139 | 425041 | EGFR    | chr7  | 55268003 | 55268111 | 1 | 109 | 109 | 0 | 1     |
| IAD39139 | 425046 | EGFR    | chr7  | 55268875 | 55269053 | 2 | 179 | 179 | 0 | 1     |
| IAD39139 | 425050 | EGFR    | chr7  | 55269422 | 55269480 | 1 | 59  | 59  | 0 | 1     |
| IAD39139 | 425054 | EGFR    | chr7  | 55270204 | 55270323 | 1 | 120 | 120 | 0 | 1     |
| IAD39139 | 425038 | EGFR    | chr7  | 55272943 | 55273315 | 3 | 373 | 373 | 0 | 1     |
| IAD39139 | 530685 | DDB1    | chr11 | 61067602 | 61067696 | 1 | 95  | 95  | 0 | 1     |
| IAD39139 | 530683 | DDB1    | chr11 | 61068275 | 61068409 | 1 | 135 | 135 | 0 | 1     |
| IAD39139 | 530698 | DDB1    | chr11 | 61069723 | 61069836 | 1 | 114 | 114 | 0 | 1     |
| IAD39139 | 530696 | DDB1    | chr11 | 61070048 | 61070228 | 2 | 181 | 181 | 0 | 1     |
| IAD39139 | 530707 | DDB1    | chr11 | 61070512 | 61070632 | 1 | 121 | 121 | 0 | 1     |
| IAD39139 | 530691 | DDB1    | chr11 | 61071331 | 61071512 | 2 | 182 | 182 | 0 | 1     |
| IAD39139 | 530701 | DDB1    | chr11 | 61076449 | 61076554 | 1 | 106 | 106 | 0 | 1     |
| IAD39139 | 530689 | DDB1    | chr11 | 61077262 | 61077437 | 2 | 176 | 176 | 0 | 1     |
| IAD39139 | 530690 | DDB1    | chr11 | 61077761 | 61077895 | 1 | 135 | 135 | 0 | 1     |
| IAD39139 | 530684 | DDB1    | chr11 | 61079250 | 61079372 | 1 | 123 | 123 | 0 | 1     |
| IAD39139 | 530688 | DDB1    | chr11 | 61079455 | 61079561 | 1 | 107 | 107 | 0 | 1     |
| IAD39139 | 530703 | DDB1    | chr11 | 61080965 | 61081183 | 2 | 219 | 219 | 0 | 1     |
| IAD39139 | 530702 | DDB1    | chr11 | 61081328 | 61081446 | 1 | 119 | 119 | 0 | 1     |
| IAD39139 | 530699 | DDB1    | chr11 | 61081513 | 61081687 | 1 | 175 | 175 | 0 | 1     |
| IAD39139 | 530687 | DDB1    | chr11 | 61081774 | 61081963 | 2 | 190 | 190 | 0 | 1     |
| IAD39139 | 530708 | DDB1    | chr11 | 61083751 | 61083870 | 1 | 120 | 120 | 0 | 1     |
| IAD39139 | 530686 | DDB1    | chr11 | 61083958 | 61084044 | 1 | 87  | 87  | 0 | 1     |
| IAD39139 | 530706 | DDB1    | chr11 | 61089061 | 61089174 | 1 | 114 | 114 | 0 | 1     |
| IAD39139 | 530694 | DDB1    | chr11 | 61089762 | 61089889 | 1 | 128 | 128 | 0 | 1     |
| IAD39139 | 530692 | DDB1    | chr11 | 61090477 | 61090571 | 1 | 95  | 95  | 0 | 1     |
| IAD39139 | 530700 | DDB1    | chr11 | 61091445 | 61091614 | 2 | 170 | 170 | 0 | 1     |
| IAD39139 | 530695 | DDB1    | chr11 | 61093077 | 61093185 | 2 | 109 | 109 | 0 | 1     |
| IAD39139 | 530697 | DDB1    | chr11 | 61094245 | 61094370 | 1 | 126 | 126 | 0 | 1     |
| IAD39139 | 530682 | DDB1    | chr11 | 61096829 | 61097061 | 2 | 233 | 233 | 0 | 1     |
| IAD39139 | 530705 | DDB1    | chr11 | 61097424 | 61097551 | 1 | 128 | 128 | 0 | 1     |
| IAD39139 | 530704 | DDB1    | chr11 | 61099009 | 61099168 | 1 | 160 | 160 | 0 | 1     |
| IAD39139 | 530693 | DDB1    | chr11 | 61100374 | 61100445 | 2 | 72  | 72  | 0 | 1     |
| IAD39139 | 599872 | ADAMTS9 | chr3  | 64507841 | 64507941 | 1 | 101 | 101 | 0 | 1     |
| IAD39139 | 599854 | ADAMTS9 | chr3  | 64518836 | 64518951 | 1 | 116 | 116 | 0 | 1     |
| IAD39139 | 599865 | ADAMTS9 | chr3  | 64524873 | 64524975 | 2 | 103 | 97  | 6 | 0.942 |
| IAD39139 | 599869 | ADAMTS9 | chr3  | 64526765 | 64526909 | 1 | 145 | 145 | 0 | 1     |
| IAD39139 | 599858 | ADAMTS9 | chr3  | 64526990 | 64527095 | 1 | 106 | 106 | 0 | 1     |
| IAD39139 | 599870 | ADAMTS9 | chr3  | 64527196 | 64527301 | 1 | 106 | 106 | 0 | 1     |
| IAD39139 | 599868 | ADAMTS9 | chr3  | 64527508 | 64527651 | 2 | 144 | 144 | 0 | 1     |
| IAD39139 | 599851 | ADAMTS9 | chr3  | 64532428 | 64532633 | 2 | 206 | 206 | 0 | 1     |
| IAD39139 | 599875 | ADAMTS9 | chr3  | 64536562 | 64536743 | 2 | 182 | 182 | 0 | 1     |
| IAD39139 | 599856 | ADAMTS9 | chr3  | 64547248 | 64547432 | 2 | 185 | 185 | 0 | 1     |
| IAD39139 | 599846 | ADAMTS9 | chr3  | 64554038 | 64554216 | 2 | 179 | 179 | 0 | 1     |
| IAD39139 | 599844 | ADAMTS9 | chr3  | 64579928 | 64580115 | 2 | 188 | 188 | 0 | 1     |
| IAD39139 | 599873 | ADAMTS9 | chr3  | 64582500 | 64582672 | 2 | 173 | 173 | 0 | 1     |
| IAD39139 | 599874 | ADAMTS9 | chr3  | 64587614 | 64587894 | 2 | 281 | 281 | 0 | 1     |
| IAD39139 | 599839 | ADAMTS9 | chr3  | 64589592 | 64589770 | 2 | 179 | 179 | 0 | 1     |
| IAD39139 | 599849 | ADAMTS9 | chr3  | 64589897 | 64590012 | 1 | 116 | 116 | 0 | 1     |
| IAD39139 | 599850 | ADAMTS9 | chr3  | 64592630 | 64592760 | 1 | 131 | 131 | 0 | 1     |
| IAD39139 | 599845 | ADAMTS9 | chr3  | 64599015 | 64599190 | 2 | 176 | 176 | 0 | 1     |

|          |        |         |       |          |          |    |      |      |    |       |
|----------|--------|---------|-------|----------|----------|----|------|------|----|-------|
| IAD39139 | 599866 | ADAMTS9 | chr3  | 64600991 | 64601166 | 2  | 176  | 176  | 0  | 1     |
| IAD39139 | 599853 | ADAMTS9 | chr3  | 64601630 | 64601851 | 2  | 222  | 222  | 0  | 1     |
| IAD39139 | 599857 | ADAMTS9 | chr3  | 64606784 | 64606921 | 1  | 138  | 102  | 36 | 0.739 |
| IAD39139 | 599848 | ADAMTS9 | chr3  | 64607868 | 64608008 | 1  | 141  | 141  | 0  | 1     |
| IAD39139 | 599855 | ADAMTS9 | chr3  | 64608090 | 64608267 | 2  | 178  | 178  | 0  | 1     |
| IAD39139 | 599871 | ADAMTS9 | chr3  | 64617125 | 64617231 | 1  | 107  | 107  | 0  | 1     |
| IAD39139 | 599859 | ADAMTS9 | chr3  | 64617478 | 64617606 | 2  | 129  | 129  | 0  | 1     |
| IAD39139 | 599838 | ADAMTS9 | chr3  | 64619142 | 64619289 | 1  | 148  | 148  | 0  | 1     |
| IAD39139 | 599847 | ADAMTS9 | chr3  | 64619368 | 64619560 | 2  | 193  | 193  | 0  | 1     |
| IAD39139 | 599863 | ADAMTS9 | chr3  | 64627518 | 64627674 | 1  | 157  | 157  | 0  | 1     |
| IAD39139 | 599861 | ADAMTS9 | chr3  | 64633610 | 64633725 | 1  | 116  | 116  | 0  | 1     |
| IAD39139 | 599842 | ADAMTS9 | chr3  | 64635307 | 64635459 | 1  | 153  | 153  | 0  | 1     |
| IAD39139 | 599852 | ADAMTS9 | chr3  | 64636687 | 64636844 | 2  | 158  | 158  | 0  | 1     |
| IAD39139 | 599876 | ADAMTS9 | chr3  | 64640023 | 64640139 | 1  | 117  | 117  | 0  | 1     |
| IAD39139 | 599862 | ADAMTS9 | chr3  | 64640242 | 64640293 | 1  | 52   | 52   | 0  | 1     |
| IAD39139 | 599860 | ADAMTS9 | chr3  | 64641246 | 64641372 | 1  | 127  | 127  | 0  | 1     |
| IAD39139 | 599840 | ADAMTS9 | chr3  | 64641462 | 64641556 | 1  | 95   | 95   | 0  | 1     |
| IAD39139 | 599864 | ADAMTS9 | chr3  | 64644172 | 64644472 | 2  | 301  | 301  | 0  | 1     |
| IAD39139 | 599841 | ADAMTS9 | chr3  | 64666871 | 64667044 | 2  | 174  | 174  | 0  | 1     |
| IAD39139 | 599867 | ADAMTS9 | chr3  | 64672238 | 64672649 | 4  | 412  | 412  | 0  | 1     |
| IAD39139 | 599843 | ADAMTS9 | chr3  | 64673213 | 64673338 | 2  | 126  | 118  | 8  | 0.937 |
| IAD39139 | 438467 | CCND1   | chr11 | 69456076 | 69456284 | 2  | 209  | 209  | 0  | 1     |
| IAD39139 | 438468 | CCND1   | chr11 | 69457793 | 69458019 | 2  | 227  | 218  | 9  | 0.96  |
| IAD39139 | 438465 | CCND1   | chr11 | 69458594 | 69458764 | 2  | 171  | 171  | 0  | 1     |
| IAD39139 | 438464 | CCND1   | chr11 | 69462756 | 69462915 | 2  | 160  | 160  | 0  | 1     |
| IAD39139 | 438466 | CCND1   | chr11 | 69465880 | 69466055 | 2  | 176  | 176  | 0  | 1     |
| IAD39139 | 522569 | ZFH3    | chr16 | 72821057 | 72822752 | 13 | 1696 | 1696 | 0  | 1     |
| IAD39139 | 522571 | ZFH3    | chr16 | 72827148 | 72832618 | 38 | 5471 | 5471 | 0  | 1     |
| IAD39139 | 522567 | ZFH3    | chr16 | 72833920 | 72834033 | 1  | 114  | 114  | 0  | 1     |
| IAD39139 | 522573 | ZFH3    | chr16 | 72845470 | 72845681 | 2  | 212  | 212  | 0  | 1     |
| IAD39139 | 522566 | ZFH3    | chr16 | 72845798 | 72845942 | 1  | 145  | 145  | 0  | 1     |
| IAD39139 | 522568 | ZFH3    | chr16 | 72863672 | 72863763 | 1  | 92   | 92   | 0  | 1     |
| IAD39139 | 522572 | ZFH3    | chr16 | 72923624 | 72923866 | 2  | 243  | 243  | 0  | 1     |
| IAD39139 | 522570 | ZFH3    | chr16 | 72984362 | 72984846 | 4  | 485  | 485  | 0  | 1     |
| IAD39139 | 522565 | ZFH3    | chr16 | 72984362 | 72984869 | 4  | 508  | 508  | 0  | 1     |
| IAD39139 | 522564 | ZFH3    | chr16 | 72991320 | 72994049 | 19 | 2730 | 2678 | 52 | 0.981 |
| IAD39139 | 581719 | DIS3    | chr13 | 73333927 | 73334021 | 2  | 95   | 95   | 0  | 1     |
| IAD39139 | 581721 | DIS3    | chr13 | 73334661 | 73334794 | 2  | 134  | 134  | 0  | 1     |
| IAD39139 | 581715 | DIS3    | chr13 | 73335495 | 73335664 | 2  | 170  | 170  | 0  | 1     |
| IAD39139 | 581730 | DIS3    | chr13 | 73335778 | 73335957 | 3  | 180  | 179  | 1  | 0.994 |
| IAD39139 | 581712 | DIS3    | chr13 | 73336055 | 73336280 | 3  | 226  | 226  | 0  | 1     |
| IAD39139 | 581726 | DIS3    | chr13 | 73337583 | 73337750 | 3  | 168  | 168  | 0  | 1     |
| IAD39139 | 581723 | DIS3    | chr13 | 73340104 | 73340201 | 2  | 98   | 98   | 0  | 1     |
| IAD39139 | 581713 | DIS3    | chr13 | 73342917 | 73343055 | 2  | 139  | 139  | 0  | 1     |
| IAD39139 | 581729 | DIS3    | chr13 | 73345036 | 73345131 | 2  | 96   | 90   | 6  | 0.938 |
| IAD39139 | 581711 | DIS3    | chr13 | 73345213 | 73345288 | 0  | 76   | 0    | 76 | 0     |
| IAD39139 | 581722 | DIS3    | chr13 | 73345927 | 73346039 | 2  | 113  | 113  | 0  | 1     |
| IAD39139 | 581714 | DIS3    | chr13 | 73346291 | 73346418 | 2  | 128  | 128  | 0  | 1     |
| IAD39139 | 581728 | DIS3    | chr13 | 73346825 | 73346982 | 2  | 158  | 158  | 0  | 1     |
| IAD39139 | 581725 | DIS3    | chr13 | 73347816 | 73347964 | 2  | 149  | 149  | 0  | 1     |
| IAD39139 | 581716 | DIS3    | chr13 | 73348078 | 73348202 | 2  | 125  | 125  | 0  | 1     |
| IAD39139 | 581709 | DIS3    | chr13 | 73349343 | 73349518 | 2  | 176  | 176  | 0  | 1     |
| IAD39139 | 581710 | DIS3    | chr13 | 73350057 | 73350235 | 1  | 179  | 135  | 44 | 0.754 |
| IAD39139 | 581717 | DIS3    | chr13 | 73351552 | 73351636 | 2  | 85   | 85   | 0  | 1     |
| IAD39139 | 581724 | DIS3    | chr13 | 73352319 | 73352523 | 2  | 205  | 205  | 0  | 1     |
| IAD39139 | 581720 | DIS3    | chr13 | 73354978 | 73355146 | 2  | 169  | 169  | 0  | 1     |
| IAD39139 | 581727 | DIS3    | chr13 | 73355421 | 73355499 | 1  | 79   | 79   | 0  | 1     |
| IAD39139 | 581718 | DIS3    | chr13 | 73355737 | 73355975 | 2  | 239  | 175  | 64 | 0.732 |
| IAD39139 | 614613 | ZFH3    | chr8  | 77616318 | 77618918 | 17 | 2601 | 2601 | 0  | 1     |
| IAD39139 | 614608 | ZFH3    | chr8  | 77619775 | 77620288 | 4  | 514  | 514  | 0  | 1     |
| IAD39139 | 614607 | ZFH3    | chr8  | 77690438 | 77690680 | 2  | 243  | 243  | 0  | 1     |

|          |        |       |       |           |           |    |      |      |   |       |
|----------|--------|-------|-------|-----------|-----------|----|------|------|---|-------|
| IAD39139 | 614609 | ZFH4  | chr8  | 77745568  | 77745647  | 1  | 80   | 80   | 0 | 1     |
| IAD39139 | 614611 | ZFH4  | chr8  | 77754885  | 77755012  | 1  | 128  | 128  | 0 | 1     |
| IAD39139 | 614604 | ZFH4  | chr8  | 77761225  | 77761369  | 2  | 145  | 145  | 0 | 1     |
| IAD39139 | 614606 | ZFH4  | chr8  | 77761742  | 77761953  | 2  | 212  | 212  | 0 | 1     |
| IAD39139 | 614612 | ZFH4  | chr8  | 77762475  | 77762603  | 2  | 129  | 129  | 0 | 1     |
| IAD39139 | 614605 | ZFH4  | chr8  | 77763116  | 77768541  | 38 | 5426 | 5426 | 0 | 1     |
| IAD39139 | 614610 | ZFH4  | chr8  | 77775324  | 77776806  | 11 | 1483 | 1483 | 0 | 1     |
| IAD39139 | 581664 | VCAN  | chr5  | 82779332  | 82779412  | 1  | 81   | 81   | 0 | 1     |
| IAD39139 | 581668 | VCAN  | chr5  | 82785911  | 82786296  | 4  | 386  | 386  | 0 | 1     |
| IAD39139 | 581660 | VCAN  | chr5  | 82789359  | 82789544  | 2  | 186  | 186  | 0 | 1     |
| IAD39139 | 581659 | VCAN  | chr5  | 82789617  | 82789755  | 1  | 139  | 139  | 0 | 1     |
| IAD39139 | 581669 | VCAN  | chr5  | 82807916  | 82808220  | 3  | 305  | 305  | 0 | 1     |
| IAD39139 | 581658 | VCAN  | chr5  | 82815162  | 82818133  | 20 | 2972 | 2972 | 0 | 1     |
| IAD39139 | 581662 | VCAN  | chr5  | 82832820  | 82838092  | 36 | 5273 | 5273 | 0 | 1     |
| IAD39139 | 581666 | VCAN  | chr5  | 82841350  | 82841474  | 1  | 125  | 125  | 0 | 1     |
| IAD39139 | 581663 | VCAN  | chr5  | 82843784  | 82843908  | 2  | 125  | 125  | 0 | 1     |
| IAD39139 | 581661 | VCAN  | chr5  | 82849177  | 82849346  | 2  | 170  | 170  | 0 | 1     |
| IAD39139 | 581665 | VCAN  | chr5  | 82850769  | 82850862  | 2  | 94   | 94   | 0 | 1     |
| IAD39139 | 581667 | VCAN  | chr5  | 82868229  | 82868384  | 2  | 156  | 156  | 0 | 1     |
| IAD39139 | 581670 | VCAN  | chr5  | 82875793  | 82875986  | 2  | 194  | 194  | 0 | 1     |
| IAD39139 | 581657 | VCAN  | chr5  | 82876120  | 82876258  | 2  | 139  | 139  | 0 | 1     |
| IAD39139 | 522324 | FAT3  | chr11 | 92085273  | 92088575  | 22 | 3303 | 3303 | 0 | 1     |
| IAD39139 | 436285 | FAT3  | chr11 | 92257794  | 92258119  | 3  | 326  | 326  | 0 | 1     |
| IAD39139 | 436283 | FAT3  | chr11 | 92430544  | 92430616  | 1  | 73   | 70   | 3 | 0.959 |
| IAD39139 | 436278 | FAT3  | chr11 | 92495016  | 92495341  | 3  | 326  | 326  | 0 | 1     |
| IAD39139 | 436297 | FAT3  | chr11 | 92498039  | 92498260  | 2  | 222  | 222  | 0 | 1     |
| IAD39139 | 436277 | FAT3  | chr11 | 92507201  | 92507351  | 2  | 151  | 151  | 0 | 1     |
| IAD39139 | 436295 | FAT3  | chr11 | 92523103  | 92523389  | 2  | 287  | 287  | 0 | 1     |
| IAD39139 | 436274 | FAT3  | chr11 | 92525927  | 92526148  | 2  | 222  | 222  | 0 | 1     |
| IAD39139 | 436292 | FAT3  | chr11 | 92530996  | 92535080  | 26 | 4085 | 4085 | 0 | 1     |
| IAD39139 | 436282 | FAT3  | chr11 | 92538313  | 92538520  | 2  | 208  | 208  | 0 | 1     |
| IAD39139 | 436289 | FAT3  | chr11 | 92539522  | 92539686  | 2  | 165  | 165  | 0 | 1     |
| IAD39139 | 436281 | FAT3  | chr11 | 92543003  | 92543247  | 2  | 245  | 245  | 0 | 1     |
| IAD39139 | 436288 | FAT3  | chr11 | 92564782  | 92565182  | 3  | 401  | 401  | 0 | 1     |
| IAD39139 | 436294 | FAT3  | chr11 | 92568030  | 92568255  | 2  | 226  | 226  | 0 | 1     |
| IAD39139 | 436291 | FAT3  | chr11 | 92569726  | 92569874  | 1  | 149  | 149  | 0 | 1     |
| IAD39139 | 436279 | FAT3  | chr11 | 92570823  | 92570977  | 1  | 155  | 155  | 0 | 1     |
| IAD39139 | 436293 | FAT3  | chr11 | 92573722  | 92573930  | 2  | 209  | 209  | 0 | 1     |
| IAD39139 | 436287 | FAT3  | chr11 | 92577094  | 92577903  | 6  | 810  | 810  | 0 | 1     |
| IAD39139 | 436290 | FAT3  | chr11 | 92590374  | 92590519  | 1  | 146  | 146  | 0 | 1     |
| IAD39139 | 436286 | FAT3  | chr11 | 92592325  | 92592493  | 2  | 169  | 169  | 0 | 1     |
| IAD39139 | 436276 | FAT3  | chr11 | 92599901  | 92600380  | 3  | 480  | 480  | 0 | 1     |
| IAD39139 | 436280 | FAT3  | chr11 | 92613891  | 92614055  | 2  | 165  | 165  | 0 | 1     |
| IAD39139 | 436275 | FAT3  | chr11 | 92615898  | 92616564  | 5  | 667  | 667  | 0 | 1     |
| IAD39139 | 436284 | FAT3  | chr11 | 92620160  | 92620284  | 1  | 125  | 125  | 0 | 1     |
| IAD39139 | 522325 | FAT3  | chr11 | 92623651  | 92624284  | 4  | 634  | 634  | 0 | 1     |
| IAD39139 | 546320 | TRAF3 | chr14 | 103336533 | 103336788 | 2  | 256  | 256  | 0 | 1     |
| IAD39139 | 546325 | TRAF3 | chr14 | 103338248 | 103338310 | 1  | 63   | 63   | 0 | 1     |
| IAD39139 | 546319 | TRAF3 | chr14 | 103341955 | 103342070 | 1  | 116  | 116  | 0 | 1     |
| IAD39139 | 546322 | TRAF3 | chr14 | 103342689 | 103342867 | 2  | 179  | 179  | 0 | 1     |
| IAD39139 | 546321 | TRAF3 | chr14 | 103352520 | 103352611 | 1  | 92   | 92   | 0 | 1     |
| IAD39139 | 546328 | TRAF3 | chr14 | 103355891 | 103355976 | 1  | 86   | 86   | 0 | 1     |
| IAD39139 | 546326 | TRAF3 | chr14 | 103357656 | 103357759 | 1  | 104  | 104  | 0 | 1     |
| IAD39139 | 546327 | TRAF3 | chr14 | 103363592 | 103363743 | 2  | 152  | 152  | 0 | 1     |
| IAD39139 | 546323 | TRAF3 | chr14 | 103369586 | 103369771 | 2  | 186  | 186  | 0 | 1     |
| IAD39139 | 546324 | TRAF3 | chr14 | 103371544 | 103372126 | 4  | 583  | 583  | 0 | 1     |
| IAD39139 | 439691 | PRDM1 | chr6  | 106534423 | 106534475 | 1  | 53   | 53   | 0 | 1     |
| IAD39139 | 439695 | PRDM1 | chr6  | 106536070 | 106536329 | 2  | 260  | 260  | 0 | 1     |
| IAD39139 | 439689 | PRDM1 | chr6  | 106543484 | 106543614 | 2  | 131  | 131  | 0 | 1     |
| IAD39139 | 439690 | PRDM1 | chr6  | 106546955 | 106546974 | 1  | 20   | 20   | 0 | 1     |
| IAD39139 | 439694 | PRDM1 | chr6  | 106547169 | 106547432 | 2  | 264  | 264  | 0 | 1     |

|          |        |       |       |           |           |   |      |      |     |       |
|----------|--------|-------|-------|-----------|-----------|---|------|------|-----|-------|
| IAD39139 | 439688 | PRDM1 | chr6  | 106552694 | 106553813 | 8 | 1120 | 1120 | 0   | 1     |
| IAD39139 | 439693 | PRDM1 | chr6  | 106554240 | 106554379 | 1 | 140  | 140  | 0   | 1     |
| IAD39139 | 439692 | PRDM1 | chr6  | 106554780 | 106555366 | 5 | 587  | 587  | 0   | 1     |
| IAD39139 | 423445 | ATM   | chr11 | 108098346 | 108098428 | 2 | 83   | 83   | 0   | 1     |
| IAD39139 | 423411 | ATM   | chr11 | 108098497 | 108098620 | 3 | 124  | 124  | 0   | 1     |
| IAD39139 | 423413 | ATM   | chr11 | 108099899 | 108100055 | 2 | 157  | 157  | 0   | 1     |
| IAD39139 | 423396 | ATM   | chr11 | 108106391 | 108106566 | 2 | 176  | 176  | 0   | 1     |
| IAD39139 | 423429 | ATM   | chr11 | 108114674 | 108114850 | 3 | 177  | 177  | 0   | 1     |
| IAD39139 | 423399 | ATM   | chr11 | 108115509 | 108115758 | 3 | 250  | 250  | 0   | 1     |
| IAD39139 | 423446 | ATM   | chr11 | 108117685 | 108117859 | 2 | 175  | 175  | 0   | 1     |
| IAD39139 | 423412 | ATM   | chr11 | 108119654 | 108119834 | 2 | 181  | 139  | 42  | 0.768 |
| IAD39139 | 423389 | ATM   | chr11 | 108121422 | 108121804 | 4 | 383  | 383  | 0   | 1     |
| IAD39139 | 423419 | ATM   | chr11 | 108122558 | 108122763 | 2 | 206  | 206  | 0   | 1     |
| IAD39139 | 423425 | ATM   | chr11 | 108123538 | 108123644 | 1 | 107  | 107  | 0   | 1     |
| IAD39139 | 423422 | ATM   | chr11 | 108124535 | 108124771 | 2 | 237  | 237  | 0   | 1     |
| IAD39139 | 423394 | ATM   | chr11 | 108126936 | 108127072 | 2 | 137  | 137  | 0   | 1     |
| IAD39139 | 423442 | ATM   | chr11 | 108128202 | 108128338 | 2 | 137  | 117  | 20  | 0.854 |
| IAD39139 | 423431 | ATM   | chr11 | 108129707 | 108129807 | 2 | 101  | 101  | 0   | 1     |
| IAD39139 | 423410 | ATM   | chr11 | 108137892 | 108138074 | 2 | 183  | 183  | 0   | 1     |
| IAD39139 | 423385 | ATM   | chr11 | 108139131 | 108139341 | 2 | 211  | 211  | 0   | 1     |
| IAD39139 | 423417 | ATM   | chr11 | 108141785 | 108141878 | 2 | 94   | 77   | 17  | 0.819 |
| IAD39139 | 423407 | ATM   | chr11 | 108141972 | 108142138 | 1 | 167  | 22   | 145 | 0.132 |
| IAD39139 | 423409 | ATM   | chr11 | 108143253 | 108143339 | 2 | 87   | 87   | 0   | 1     |
| IAD39139 | 423401 | ATM   | chr11 | 108143443 | 108143584 | 1 | 142  | 130  | 12  | 0.915 |
| IAD39139 | 423435 | ATM   | chr11 | 108150212 | 108150340 | 2 | 129  | 129  | 0   | 1     |
| IAD39139 | 423423 | ATM   | chr11 | 108151716 | 108151900 | 2 | 185  | 185  | 0   | 1     |
| IAD39139 | 423430 | ATM   | chr11 | 108153431 | 108153611 | 2 | 181  | 181  | 0   | 1     |
| IAD39139 | 423406 | ATM   | chr11 | 108154948 | 108155205 | 3 | 258  | 258  | 0   | 1     |
| IAD39139 | 423405 | ATM   | chr11 | 108158321 | 108158447 | 2 | 127  | 127  | 0   | 1     |
| IAD39139 | 423424 | ATM   | chr11 | 108159698 | 108159835 | 2 | 138  | 138  | 0   | 1     |
| IAD39139 | 423415 | ATM   | chr11 | 108160323 | 108160533 | 2 | 211  | 211  | 0   | 1     |
| IAD39139 | 423438 | ATM   | chr11 | 108163340 | 108163525 | 2 | 186  | 186  | 0   | 1     |
| IAD39139 | 423443 | ATM   | chr11 | 108164034 | 108164209 | 2 | 176  | 176  | 0   | 1     |
| IAD39139 | 423398 | ATM   | chr11 | 108165648 | 108165791 | 1 | 144  | 144  | 0   | 1     |
| IAD39139 | 423426 | ATM   | chr11 | 108168008 | 108168114 | 1 | 107  | 71   | 36  | 0.664 |
| IAD39139 | 423420 | ATM   | chr11 | 108170435 | 108170617 | 2 | 183  | 183  | 0   | 1     |
| IAD39139 | 423444 | ATM   | chr11 | 108172369 | 108172521 | 2 | 153  | 153  | 0   | 1     |
| IAD39139 | 423439 | ATM   | chr11 | 108173574 | 108173761 | 2 | 188  | 188  | 0   | 1     |
| IAD39139 | 423397 | ATM   | chr11 | 108175396 | 108175584 | 3 | 189  | 189  | 0   | 1     |
| IAD39139 | 423402 | ATM   | chr11 | 108178618 | 108178716 | 1 | 99   | 99   | 0   | 1     |
| IAD39139 | 423434 | ATM   | chr11 | 108180881 | 108181047 | 2 | 167  | 167  | 0   | 1     |
| IAD39139 | 423428 | ATM   | chr11 | 108183132 | 108183230 | 2 | 99   | 99   | 0   | 1     |
| IAD39139 | 423387 | ATM   | chr11 | 108186544 | 108186643 | 1 | 100  | 100  | 0   | 1     |
| IAD39139 | 423391 | ATM   | chr11 | 108186732 | 108186845 | 1 | 114  | 114  | 0   | 1     |
| IAD39139 | 423418 | ATM   | chr11 | 108188094 | 108188253 | 2 | 160  | 160  | 0   | 1     |
| IAD39139 | 423392 | ATM   | chr11 | 108190675 | 108190790 | 2 | 116  | 116  | 0   | 1     |
| IAD39139 | 423403 | ATM   | chr11 | 108192022 | 108192152 | 2 | 131  | 131  | 0   | 1     |
| IAD39139 | 423393 | ATM   | chr11 | 108196031 | 108196276 | 2 | 246  | 246  | 0   | 1     |
| IAD39139 | 423433 | ATM   | chr11 | 108196779 | 108196957 | 2 | 179  | 101  | 78  | 0.564 |
| IAD39139 | 423395 | ATM   | chr11 | 108198366 | 108198490 | 2 | 125  | 125  | 0   | 1     |
| IAD39139 | 423436 | ATM   | chr11 | 108199742 | 108199970 | 3 | 229  | 221  | 8   | 0.965 |
| IAD39139 | 423427 | ATM   | chr11 | 108200935 | 108201153 | 2 | 219  | 219  | 0   | 1     |
| IAD39139 | 423437 | ATM   | chr11 | 108202165 | 108202289 | 2 | 125  | 125  | 0   | 1     |
| IAD39139 | 423432 | ATM   | chr11 | 108202600 | 108202769 | 2 | 170  | 170  | 0   | 1     |
| IAD39139 | 423404 | ATM   | chr11 | 108203483 | 108203632 | 2 | 150  | 150  | 0   | 1     |
| IAD39139 | 423388 | ATM   | chr11 | 108204607 | 108204700 | 2 | 94   | 78   | 16  | 0.83  |
| IAD39139 | 423414 | ATM   | chr11 | 108205690 | 108205841 | 2 | 152  | 152  | 0   | 1     |
| IAD39139 | 423440 | ATM   | chr11 | 108206566 | 108206693 | 2 | 128  | 128  | 0   | 1     |
| IAD39139 | 423416 | ATM   | chr11 | 108213943 | 108214103 | 2 | 161  | 161  | 0   | 1     |
| IAD39139 | 423400 | ATM   | chr11 | 108216464 | 108216640 | 1 | 177  | 115  | 62  | 0.65  |
| IAD39139 | 423390 | ATM   | chr11 | 108218000 | 108218097 | 1 | 98   | 98   | 0   | 1     |

|          |        |       |       |           |           |   |     |     |    |       |
|----------|--------|-------|-------|-----------|-----------|---|-----|-----|----|-------|
| IAD39139 | 423386 | ATM   | chr11 | 108224487 | 108224612 | 1 | 126 | 126 | 0  | 1     |
| IAD39139 | 423408 | ATM   | chr11 | 108225532 | 108225606 | 1 | 75  | 75  | 0  | 1     |
| IAD39139 | 423441 | ATM   | chr11 | 108235803 | 108235950 | 2 | 148 | 148 | 0  | 1     |
| IAD39139 | 423421 | ATM   | chr11 | 108236046 | 108236240 | 2 | 195 | 195 | 0  | 1     |
| IAD39139 | 426406 | ANK2  | chr4  | 113825644 | 113825675 | 2 | 32  | 16  | 16 | 0.5   |
| IAD39139 | 530730 | CUL4A | chr13 | 113863936 | 113864094 | 1 | 159 | 103 | 56 | 0.648 |
| IAD39139 | 530737 | CUL4A | chr13 | 113864281 | 113864407 | 2 | 127 | 107 | 20 | 0.843 |
| IAD39139 | 530735 | CUL4A | chr13 | 113873289 | 113873367 | 2 | 79  | 79  | 0  | 1     |
| IAD39139 | 530740 | CUL4A | chr13 | 113873253 | 113873367 | 2 | 115 | 115 | 0  | 1     |
| IAD39139 | 530725 | CUL4A | chr13 | 113882284 | 113882364 | 1 | 81  | 81  | 0  | 1     |
| IAD39139 | 530728 | CUL4A | chr13 | 113883754 | 113883838 | 1 | 85  | 85  | 0  | 1     |
| IAD39139 | 530733 | CUL4A | chr13 | 113887485 | 113887658 | 2 | 174 | 174 | 0  | 1     |
| IAD39139 | 530727 | CUL4A | chr13 | 113888205 | 113888305 | 1 | 101 | 101 | 0  | 1     |
| IAD39139 | 530734 | CUL4A | chr13 | 113889371 | 113889464 | 1 | 94  | 94  | 0  | 1     |
| IAD39139 | 530738 | CUL4A | chr13 | 113891131 | 113891209 | 1 | 79  | 79  | 0  | 1     |
| IAD39139 | 530726 | CUL4A | chr13 | 113893741 | 113893870 | 2 | 130 | 130 | 0  | 1     |
| IAD39139 | 530741 | CUL4A | chr13 | 113897276 | 113897479 | 2 | 204 | 204 | 0  | 1     |
| IAD39139 | 530724 | CUL4A | chr13 | 113898718 | 113898833 | 1 | 116 | 116 | 0  | 1     |
| IAD39139 | 530736 | CUL4A | chr13 | 113899257 | 113899378 | 1 | 122 | 122 | 0  | 1     |
| IAD39139 | 530739 | CUL4A | chr13 | 113899460 | 113899556 | 1 | 97  | 97  | 0  | 1     |
| IAD39139 | 530729 | CUL4A | chr13 | 113900264 | 113900382 | 2 | 119 | 119 | 0  | 1     |
| IAD39139 | 530722 | CUL4A | chr13 | 113907390 | 113907514 | 1 | 125 | 106 | 19 | 0.848 |
| IAD39139 | 530731 | CUL4A | chr13 | 113909001 | 113909117 | 1 | 117 | 117 | 0  | 1     |
| IAD39139 | 530742 | CUL4A | chr13 | 113909261 | 113909444 | 2 | 184 | 184 | 0  | 1     |
| IAD39139 | 530732 | CUL4A | chr13 | 113914915 | 113915078 | 1 | 164 | 132 | 32 | 0.805 |
| IAD39139 | 530723 | CUL4A | chr13 | 113917795 | 113917901 | 2 | 107 | 107 | 0  | 1     |
| IAD39139 | 426410 | ANK2  | chr4  | 113970879 | 113970973 | 1 | 95  | 95  | 0  | 1     |
| IAD39139 | 426432 | ANK2  | chr4  | 114095566 | 114095678 | 1 | 113 | 113 | 0  | 1     |
| IAD39139 | 426398 | ANK2  | chr4  | 114117518 | 114117627 | 2 | 110 | 97  | 13 | 0.882 |
| IAD39139 | 426429 | ANK2  | chr4  | 114120161 | 114120270 | 2 | 110 | 110 | 0  | 1     |
| IAD39139 | 426428 | ANK2  | chr4  | 114153311 | 114153420 | 1 | 110 | 110 | 0  | 1     |
| IAD39139 | 426393 | ANK2  | chr4  | 114158137 | 114158333 | 2 | 197 | 197 | 0  | 1     |
| IAD39139 | 426407 | ANK2  | chr4  | 114158749 | 114158783 | 1 | 35  | 35  | 0  | 1     |
| IAD39139 | 426419 | ANK2  | chr4  | 114161635 | 114161744 | 1 | 110 | 110 | 0  | 1     |
| IAD39139 | 426411 | ANK2  | chr4  | 114163261 | 114163370 | 1 | 110 | 110 | 0  | 1     |
| IAD39139 | 426433 | ANK2  | chr4  | 114170914 | 114171023 | 1 | 110 | 110 | 0  | 1     |
| IAD39139 | 426415 | ANK2  | chr4  | 114176885 | 114177093 | 2 | 209 | 209 | 0  | 1     |
| IAD39139 | 426417 | ANK2  | chr4  | 114179200 | 114179309 | 1 | 110 | 110 | 0  | 1     |
| IAD39139 | 426414 | ANK2  | chr4  | 114179463 | 114179572 | 1 | 110 | 110 | 0  | 1     |
| IAD39139 | 426405 | ANK2  | chr4  | 114186047 | 114186156 | 1 | 110 | 110 | 0  | 1     |
| IAD39139 | 426404 | ANK2  | chr4  | 114195602 | 114195810 | 2 | 209 | 209 | 0  | 1     |
| IAD39139 | 426431 | ANK2  | chr4  | 114198987 | 114199096 | 2 | 110 | 110 | 0  | 1     |
| IAD39139 | 426395 | ANK2  | chr4  | 114199610 | 114199719 | 1 | 110 | 110 | 0  | 1     |
| IAD39139 | 426418 | ANK2  | chr4  | 114203825 | 114204033 | 2 | 209 | 209 | 0  | 1     |
| IAD39139 | 426423 | ANK2  | chr4  | 114208755 | 114208864 | 1 | 110 | 110 | 0  | 1     |
| IAD39139 | 426413 | ANK2  | chr4  | 114209538 | 114209647 | 2 | 110 | 110 | 0  | 1     |
| IAD39139 | 426412 | ANK2  | chr4  | 114213566 | 114213675 | 1 | 110 | 110 | 0  | 1     |
| IAD39139 | 426387 | ANK2  | chr4  | 114214590 | 114214699 | 1 | 110 | 110 | 0  | 1     |
| IAD39139 | 426403 | ANK2  | chr4  | 114223917 | 114224000 | 1 | 84  | 84  | 0  | 1     |
| IAD39139 | 426394 | ANK2  | chr4  | 114232405 | 114232560 | 1 | 156 | 156 | 0  | 1     |
| IAD39139 | 426402 | ANK2  | chr4  | 114238857 | 114238970 | 1 | 114 | 114 | 0  | 1     |
| IAD39139 | 426422 | ANK2  | chr4  | 114239667 | 114239781 | 1 | 115 | 115 | 0  | 1     |
| IAD39139 | 426392 | ANK2  | chr4  | 114244909 | 114244955 | 1 | 47  | 47  | 0  | 1     |
| IAD39139 | 426427 | ANK2  | chr4  | 114251396 | 114251631 | 2 | 236 | 236 | 0  | 1     |
| IAD39139 | 426425 | ANK2  | chr4  | 114253122 | 114253231 | 1 | 110 | 110 | 0  | 1     |
| IAD39139 | 426397 | ANK2  | chr4  | 114254204 | 114254369 | 2 | 166 | 166 | 0  | 1     |
| IAD39139 | 426400 | ANK2  | chr4  | 114256996 | 114257218 | 2 | 223 | 223 | 0  | 1     |
| IAD39139 | 426426 | ANK2  | chr4  | 114257727 | 114257942 | 3 | 216 | 216 | 0  | 1     |
| IAD39139 | 426396 | ANK2  | chr4  | 114260376 | 114260483 | 1 | 108 | 108 | 0  | 1     |
| IAD39139 | 426391 | ANK2  | chr4  | 114262838 | 114263077 | 3 | 240 | 240 | 0  | 1     |
| IAD39139 | 426434 | ANK2  | chr4  | 114264167 | 114264303 | 2 | 137 | 137 | 0  | 1     |

|          |        |        |      |           |           |    |      |      |     |        |
|----------|--------|--------|------|-----------|-----------|----|------|------|-----|--------|
| IAD39139 | 426390 | ANK2   | chr4 | 114267050 | 114267183 | 1  | 134  | 134  | 0   | 1      |
| IAD39139 | 426424 | ANK2   | chr4 | 114269426 | 114269469 | 1  | 44   | 44   | 0   | 1      |
| IAD39139 | 426388 | ANK2   | chr4 | 114271378 | 114271410 | 1  | 33   | 33   | 0   | 1      |
| IAD39139 | 426399 | ANK2   | chr4 | 114274195 | 114280460 | 41 | 6266 | 6266 | 0   | 1      |
| IAD39139 | 426421 | ANK2   | chr4 | 114281973 | 114282058 | 1  | 86   | 86   | 0   | 1      |
| IAD39139 | 426401 | ANK2   | chr4 | 114284488 | 114284630 | 2  | 143  | 143  | 0   | 1      |
| IAD39139 | 426416 | ANK2   | chr4 | 114286189 | 114286343 | 2  | 155  | 155  | 0   | 1      |
| IAD39139 | 426409 | ANK2   | chr4 | 114288716 | 114289012 | 3  | 297  | 297  | 0   | 1      |
| IAD39139 | 426408 | ANK2   | chr4 | 114290664 | 114290966 | 2  | 303  | 303  | 0   | 1      |
| IAD39139 | 426430 | ANK2   | chr4 | 114294240 | 114294334 | 2  | 95   | 95   | 0   | 1      |
| IAD39139 | 426389 | ANK2   | chr4 | 114294435 | 114294610 | 2  | 176  | 176  | 0   | 1      |
| IAD39139 | 426420 | ANK2   | chr4 | 114302607 | 114302632 | 1  | 26   | 26   | 0   | 1      |
| IAD39139 | 425024 | NRAS   | chr1 | 115251150 | 115251280 | 2  | 131  | 131  | 0   | 1      |
| IAD39139 | 425022 | NRAS   | chr1 | 115252184 | 115252354 | 2  | 171  | 171  | 0   | 1      |
| IAD39139 | 425025 | NRAS   | chr1 | 115256415 | 115256604 | 2  | 190  | 190  | 0   | 1      |
| IAD39139 | 425023 | NRAS   | chr1 | 115258665 | 115258786 | 1  | 122  | 122  | 0   | 1      |
| IAD39139 | 443545 | FAM46C | chr1 | 118165485 | 118171016 | 38 | 5532 | 5425 | 107 | 0.9807 |
| IAD39139 | 498152 | CUL4B  | chrX | 119660610 | 119660716 | 1  | 107  | 107  | 0   | 1      |
| IAD39139 | 498161 | CUL4B  | chrX | 119663951 | 119664114 | 2  | 164  | 164  | 0   | 1      |
| IAD39139 | 498167 | CUL4B  | chrX | 119666271 | 119666454 | 2  | 184  | 184  | 0   | 1      |
| IAD39139 | 498160 | CUL4B  | chrX | 119668330 | 119668446 | 2  | 117  | 117  | 0   | 1      |
| IAD39139 | 498151 | CUL4B  | chrX | 119669679 | 119669803 | 2  | 125  | 125  | 0   | 1      |
| IAD39139 | 498156 | CUL4B  | chrX | 119670776 | 119670894 | 2  | 119  | 119  | 0   | 1      |
| IAD39139 | 498158 | CUL4B  | chrX | 119671973 | 119672069 | 2  | 97   | 97   | 0   | 1      |
| IAD39139 | 498155 | CUL4B  | chrX | 119672509 | 119672630 | 1  | 122  | 122  | 0   | 1      |
| IAD39139 | 498154 | CUL4B  | chrX | 119673117 | 119673232 | 1  | 116  | 116  | 0   | 1      |
| IAD39139 | 498171 | CUL4B  | chrX | 119674219 | 119674422 | 2  | 204  | 186  | 18  | 0.912  |
| IAD39139 | 498165 | CUL4B  | chrX | 119675451 | 119675580 | 2  | 130  | 110  | 20  | 0.846  |
| IAD39139 | 498157 | CUL4B  | chrX | 119676815 | 119676893 | 1  | 79   | 79   | 0   | 1      |
| IAD39139 | 498163 | CUL4B  | chrX | 119677576 | 119677669 | 1  | 94   | 94   | 0   | 1      |
| IAD39139 | 498162 | CUL4B  | chrX | 119677963 | 119678063 | 2  | 101  | 101  | 0   | 1      |
| IAD39139 | 498166 | CUL4B  | chrX | 119678330 | 119678503 | 2  | 174  | 174  | 0   | 1      |
| IAD39139 | 498170 | CUL4B  | chrX | 119679293 | 119679377 | 1  | 85   | 85   | 0   | 1      |
| IAD39139 | 498168 | CUL4B  | chrX | 119680396 | 119680476 | 2  | 81   | 81   | 0   | 1      |
| IAD39139 | 498153 | CUL4B  | chrX | 119680985 | 119681099 | 2  | 115  | 115  | 0   | 1      |
| IAD39139 | 498159 | CUL4B  | chrX | 119691773 | 119691899 | 1  | 127  | 127  | 0   | 1      |
| IAD39139 | 498164 | CUL4B  | chrX | 119693932 | 119694485 | 5  | 554  | 554  | 0   | 1      |
| IAD39139 | 498169 | CUL4B  | chrX | 119693932 | 119694498 | 5  | 567  | 567  | 0   | 1      |
| IAD39139 | 498150 | CUL4B  | chrX | 119708400 | 119708477 | 1  | 78   | 78   | 0   | 1      |
| IAD39139 | 423611 | FAT4   | chr4 | 126237561 | 126242746 | 35 | 5186 | 5186 | 0   | 1      |
| IAD39139 | 423605 | FAT4   | chr4 | 126319933 | 126320075 | 1  | 143  | 143  | 0   | 1      |
| IAD39139 | 423608 | FAT4   | chr4 | 126328029 | 126328301 | 2  | 273  | 273  | 0   | 1      |
| IAD39139 | 423617 | FAT4   | chr4 | 126329593 | 126329954 | 4  | 362  | 362  | 0   | 1      |
| IAD39139 | 423616 | FAT4   | chr4 | 126336033 | 126336966 | 6  | 934  | 934  | 0   | 1      |
| IAD39139 | 423613 | FAT4   | chr4 | 126337597 | 126337782 | 2  | 186  | 186  | 0   | 1      |
| IAD39139 | 423619 | FAT4   | chr4 | 126355394 | 126355585 | 3  | 192  | 185  | 7   | 0.964  |
| IAD39139 | 423610 | FAT4   | chr4 | 126367448 | 126367703 | 2  | 256  | 256  | 0   | 1      |
| IAD39139 | 423607 | FAT4   | chr4 | 126369610 | 126373970 | 27 | 4361 | 4142 | 219 | 0.9498 |
| IAD39139 | 423604 | FAT4   | chr4 | 126384712 | 126384827 | 2  | 116  | 113  | 3   | 0.974  |
| IAD39139 | 423615 | FAT4   | chr4 | 126389661 | 126389979 | 3  | 319  | 319  | 0   | 1      |
| IAD39139 | 423606 | FAT4   | chr4 | 126397320 | 126397416 | 2  | 97   | 97   | 0   | 1      |
| IAD39139 | 423612 | FAT4   | chr4 | 126398304 | 126398494 | 3  | 191  | 191  | 0   | 1      |
| IAD39139 | 423609 | FAT4   | chr4 | 126400890 | 126401025 | 2  | 136  | 136  | 0   | 1      |
| IAD39139 | 423614 | FAT4   | chr4 | 126402670 | 126402898 | 2  | 229  | 229  | 0   | 1      |
| IAD39139 | 423618 | FAT4   | chr4 | 126408494 | 126408766 | 3  | 273  | 273  | 0   | 1      |
| IAD39139 | 423603 | FAT4   | chr4 | 126411050 | 126412928 | 14 | 1879 | 1879 | 0   | 1      |
| IAD39139 | 581672 | EGR1   | chr5 | 137801445 | 137801762 | 3  | 318  | 318  | 0   | 1      |
| IAD39139 | 581671 | EGR1   | chr5 | 137802440 | 137803775 | 9  | 1336 | 1142 | 194 | 0.8548 |
| IAD39139 | 423045 | BRAF   | chr7 | 140434391 | 140434575 | 2  | 185  | 185  | 0   | 1      |
| IAD39139 | 423061 | BRAF   | chr7 | 140439606 | 140439751 | 2  | 146  | 146  | 0   | 1      |
| IAD39139 | 423047 | BRAF   | chr7 | 140449081 | 140449223 | 2  | 143  | 143  | 0   | 1      |

|          |        |       |      |           |           |   |     |     |     |       |
|----------|--------|-------|------|-----------|-----------|---|-----|-----|-----|-------|
| IAD39139 | 423049 | BRAF  | chr7 | 140453069 | 140453198 | 1 | 130 | 130 | 0   | 1     |
| IAD39139 | 423048 | BRAF  | chr7 | 140453981 | 140454038 | 1 | 58  | 58  | 0   | 1     |
| IAD39139 | 423058 | BRAF  | chr7 | 140476706 | 140476893 | 2 | 188 | 188 | 0   | 1     |
| IAD39139 | 423050 | BRAF  | chr7 | 140477785 | 140477880 | 2 | 96  | 96  | 0   | 1     |
| IAD39139 | 423059 | BRAF  | chr7 | 140481370 | 140481498 | 1 | 129 | 129 | 0   | 1     |
| IAD39139 | 423057 | BRAF  | chr7 | 140482815 | 140482962 | 2 | 148 | 148 | 0   | 1     |
| IAD39139 | 423060 | BRAF  | chr7 | 140487342 | 140487389 | 1 | 48  | 48  | 0   | 1     |
| IAD39139 | 423044 | BRAF  | chr7 | 140494102 | 140494272 | 3 | 171 | 171 | 0   | 1     |
| IAD39139 | 423055 | BRAF  | chr7 | 140500156 | 140500286 | 1 | 131 | 131 | 0   | 1     |
| IAD39139 | 423056 | BRAF  | chr7 | 140501206 | 140501365 | 2 | 160 | 160 | 0   | 1     |
| IAD39139 | 423046 | BRAF  | chr7 | 140507754 | 140507867 | 2 | 114 | 114 | 0   | 1     |
| IAD39139 | 423054 | BRAF  | chr7 | 140508686 | 140508800 | 2 | 115 | 115 | 0   | 1     |
| IAD39139 | 423053 | BRAF  | chr7 | 140534403 | 140534677 | 3 | 275 | 275 | 0   | 1     |
| IAD39139 | 423051 | BRAF  | chr7 | 140549905 | 140550017 | 2 | 113 | 113 | 0   | 1     |
| IAD39139 | 423052 | BRAF  | chr7 | 140624360 | 140624508 | 2 | 149 | 147 | 2   | 0.987 |
| IAD39139 | 438867 | LRP1B | chr2 | 140990749 | 140990900 | 2 | 152 | 152 | 0   | 1     |
| IAD39139 | 438887 | LRP1B | chr2 | 140992349 | 140992458 | 0 | 110 | 0   | 110 | 0     |
| IAD39139 | 438907 | LRP1B | chr2 | 140995715 | 140995870 | 2 | 156 | 156 | 0   | 1     |
| IAD39139 | 438881 | LRP1B | chr2 | 140997005 | 140997106 | 2 | 102 | 91  | 11  | 0.892 |
| IAD39139 | 438895 | LRP1B | chr2 | 141004649 | 141004736 | 2 | 88  | 88  | 0   | 1     |
| IAD39139 | 438888 | LRP1B | chr2 | 141027805 | 141027920 | 1 | 116 | 116 | 0   | 1     |
| IAD39139 | 438951 | LRP1B | chr2 | 141031987 | 141032172 | 2 | 186 | 186 | 0   | 1     |
| IAD39139 | 438892 | LRP1B | chr2 | 141055371 | 141055543 | 2 | 173 | 159 | 14  | 0.919 |
| IAD39139 | 438940 | LRP1B | chr2 | 141072498 | 141072673 | 3 | 176 | 176 | 0   | 1     |
| IAD39139 | 438906 | LRP1B | chr2 | 141079526 | 141079662 | 2 | 137 | 137 | 0   | 1     |
| IAD39139 | 438950 | LRP1B | chr2 | 141081456 | 141081640 | 2 | 185 | 108 | 77  | 0.584 |
| IAD39139 | 438889 | LRP1B | chr2 | 141083325 | 141083452 | 2 | 128 | 128 | 0   | 1     |
| IAD39139 | 438870 | LRP1B | chr2 | 141092016 | 141092133 | 1 | 118 | 118 | 0   | 1     |
| IAD39139 | 438918 | LRP1B | chr2 | 141093178 | 141093412 | 3 | 235 | 235 | 0   | 1     |
| IAD39139 | 438919 | LRP1B | chr2 | 141108360 | 141108612 | 3 | 253 | 233 | 20  | 0.921 |
| IAD39139 | 438912 | LRP1B | chr2 | 141110516 | 141110646 | 2 | 131 | 131 | 0   | 1     |
| IAD39139 | 438937 | LRP1B | chr2 | 141113905 | 141114050 | 2 | 146 | 146 | 0   | 1     |
| IAD39139 | 438901 | LRP1B | chr2 | 141115542 | 141115690 | 1 | 149 | 149 | 0   | 1     |
| IAD39139 | 438874 | LRP1B | chr2 | 141116384 | 141116520 | 1 | 137 | 137 | 0   | 1     |
| IAD39139 | 438893 | LRP1B | chr2 | 141122224 | 141122357 | 2 | 134 | 134 | 0   | 1     |
| IAD39139 | 438898 | LRP1B | chr2 | 141128273 | 141128416 | 2 | 144 | 144 | 0   | 1     |
| IAD39139 | 438955 | LRP1B | chr2 | 141128742 | 141128859 | 2 | 118 | 80  | 38  | 0.678 |
| IAD39139 | 438942 | LRP1B | chr2 | 141130571 | 141130711 | 2 | 141 | 141 | 0   | 1     |
| IAD39139 | 438914 | LRP1B | chr2 | 141135743 | 141135860 | 2 | 118 | 118 | 0   | 1     |
| IAD39139 | 438882 | LRP1B | chr2 | 141143456 | 141143583 | 1 | 128 | 128 | 0   | 1     |
| IAD39139 | 438886 | LRP1B | chr2 | 141200067 | 141200197 | 1 | 131 | 131 | 0   | 1     |
| IAD39139 | 438905 | LRP1B | chr2 | 141201893 | 141202023 | 2 | 131 | 131 | 0   | 1     |
| IAD39139 | 438911 | LRP1B | chr2 | 141202126 | 141202253 | 2 | 128 | 128 | 0   | 1     |
| IAD39139 | 599899 | RASA2 | chr3 | 141205920 | 141206063 | 1 | 144 | 36  | 108 | 0.25  |
| IAD39139 | 438926 | LRP1B | chr2 | 141208131 | 141208235 | 1 | 105 | 105 | 0   | 1     |
| IAD39139 | 438908 | LRP1B | chr2 | 141214018 | 141214177 | 2 | 160 | 160 | 0   | 1     |
| IAD39139 | 438923 | LRP1B | chr2 | 141215026 | 141215225 | 3 | 200 | 200 | 0   | 1     |
| IAD39139 | 599904 | RASA2 | chr3 | 141230999 | 141231127 | 2 | 129 | 129 | 0   | 1     |
| IAD39139 | 438916 | LRP1B | chr2 | 141232701 | 141232911 | 2 | 211 | 204 | 7   | 0.967 |
| IAD39139 | 599911 | RASA2 | chr3 | 141235164 | 141235278 | 2 | 115 | 107 | 8   | 0.93  |
| IAD39139 | 438869 | LRP1B | chr2 | 141242906 | 141243098 | 2 | 193 | 193 | 0   | 1     |
| IAD39139 | 438927 | LRP1B | chr2 | 141245180 | 141245313 | 2 | 134 | 134 | 0   | 1     |
| IAD39139 | 599906 | RASA2 | chr3 | 141248544 | 141248649 | 2 | 106 | 90  | 16  | 0.849 |
| IAD39139 | 438931 | LRP1B | chr2 | 141250171 | 141250267 | 1 | 97  | 97  | 0   | 1     |
| IAD39139 | 438943 | LRP1B | chr2 | 141253128 | 141253322 | 2 | 195 | 195 | 0   | 1     |
| IAD39139 | 438902 | LRP1B | chr2 | 141259250 | 141259448 | 2 | 199 | 199 | 0   | 1     |
| IAD39139 | 599914 | RASA2 | chr3 | 141259369 | 141259456 | 2 | 88  | 88  | 0   | 1     |
| IAD39139 | 438876 | LRP1B | chr2 | 141260526 | 141260677 | 2 | 152 | 152 | 0   | 1     |
| IAD39139 | 438879 | LRP1B | chr2 | 141264359 | 141264492 | 2 | 134 | 134 | 0   | 1     |
| IAD39139 | 438873 | LRP1B | chr2 | 141267491 | 141267630 | 1 | 140 | 140 | 0   | 1     |
| IAD39139 | 438925 | LRP1B | chr2 | 141272216 | 141272346 | 1 | 131 | 131 | 0   | 1     |

|          |        |       |      |           |           |   |     |     |    |       |
|----------|--------|-------|------|-----------|-----------|---|-----|-----|----|-------|
| IAD39139 | 599915 | RASA2 | chr3 | 141272693 | 141272787 | 2 | 95  | 95  | 0  | 1     |
| IAD39139 | 438957 | LRP1B | chr2 | 141274452 | 141274585 | 3 | 134 | 125 | 9  | 0.933 |
| IAD39139 | 599903 | RASA2 | chr3 | 141274676 | 141274759 | 2 | 84  | 84  | 0  | 1     |
| IAD39139 | 599902 | RASA2 | chr3 | 141277722 | 141277809 | 1 | 88  | 88  | 0  | 1     |
| IAD39139 | 599898 | RASA2 | chr3 | 141278730 | 141278842 | 2 | 113 | 113 | 0  | 1     |
| IAD39139 | 438903 | LRP1B | chr2 | 141283407 | 141283567 | 2 | 161 | 161 | 0  | 1     |
| IAD39139 | 438924 | LRP1B | chr2 | 141283800 | 141283924 | 1 | 125 | 125 | 0  | 1     |
| IAD39139 | 599897 | RASA2 | chr3 | 141289748 | 141289915 | 2 | 168 | 168 | 0  | 1     |
| IAD39139 | 599909 | RASA2 | chr3 | 141290242 | 141290401 | 2 | 160 | 160 | 0  | 1     |
| IAD39139 | 599916 | RASA2 | chr3 | 141291445 | 141291570 | 2 | 126 | 126 | 0  | 1     |
| IAD39139 | 438900 | LRP1B | chr2 | 141291584 | 141291714 | 1 | 131 | 131 | 0  | 1     |
| IAD39139 | 599908 | RASA2 | chr3 | 141291983 | 141292068 | 2 | 86  | 76  | 10 | 0.884 |
| IAD39139 | 599912 | RASA2 | chr3 | 141292780 | 141292914 | 2 | 135 | 116 | 19 | 0.859 |
| IAD39139 | 438945 | LRP1B | chr2 | 141294144 | 141294283 | 1 | 140 | 140 | 0  | 1     |
| IAD39139 | 599894 | RASA2 | chr3 | 141295836 | 141295953 | 2 | 118 | 118 | 0  | 1     |
| IAD39139 | 438930 | LRP1B | chr2 | 141298536 | 141298672 | 2 | 137 | 137 | 0  | 1     |
| IAD39139 | 599910 | RASA2 | chr3 | 141299204 | 141299298 | 2 | 95  | 95  | 0  | 1     |
| IAD39139 | 438922 | LRP1B | chr2 | 141299342 | 141299545 | 3 | 204 | 204 | 0  | 1     |
| IAD39139 | 599893 | RASA2 | chr3 | 141299936 | 141300024 | 2 | 89  | 62  | 27 | 0.697 |
| IAD39139 | 599905 | RASA2 | chr3 | 141304861 | 141304945 | 1 | 85  | 28  | 57 | 0.329 |
| IAD39139 | 599896 | RASA2 | chr3 | 141305482 | 141305599 | 2 | 118 | 118 | 0  | 1     |
| IAD39139 | 599900 | RASA2 | chr3 | 141326514 | 141326607 | 2 | 94  | 94  | 0  | 1     |
| IAD39139 | 599901 | RASA2 | chr3 | 141327325 | 141327544 | 2 | 220 | 204 | 16 | 0.927 |
| IAD39139 | 599907 | RASA2 | chr3 | 141328256 | 141328370 | 2 | 115 | 115 | 0  | 1     |
| IAD39139 | 599913 | RASA2 | chr3 | 141328713 | 141328913 | 2 | 201 | 201 | 0  | 1     |
| IAD39139 | 599895 | RASA2 | chr3 | 141331119 | 141331160 | 1 | 42  | 42  | 0  | 1     |
| IAD39139 | 438941 | LRP1B | chr2 | 141356194 | 141356409 | 3 | 216 | 216 | 0  | 1     |
| IAD39139 | 438932 | LRP1B | chr2 | 141359013 | 141359213 | 3 | 201 | 201 | 0  | 1     |
| IAD39139 | 438928 | LRP1B | chr2 | 141457813 | 141458195 | 5 | 383 | 383 | 0  | 1     |
| IAD39139 | 438872 | LRP1B | chr2 | 141459284 | 141459419 | 2 | 136 | 136 | 0  | 1     |
| IAD39139 | 438913 | LRP1B | chr2 | 141459704 | 141459866 | 2 | 163 | 163 | 0  | 1     |
| IAD39139 | 438868 | LRP1B | chr2 | 141459990 | 141460127 | 1 | 138 | 113 | 25 | 0.819 |
| IAD39139 | 438878 | LRP1B | chr2 | 141473536 | 141473676 | 3 | 141 | 141 | 0  | 1     |
| IAD39139 | 438949 | LRP1B | chr2 | 141474245 | 141474390 | 2 | 146 | 146 | 0  | 1     |
| IAD39139 | 438939 | LRP1B | chr2 | 141526776 | 141526918 | 2 | 143 | 143 | 0  | 1     |
| IAD39139 | 438909 | LRP1B | chr2 | 141528444 | 141528580 | 2 | 137 | 137 | 0  | 1     |
| IAD39139 | 438953 | LRP1B | chr2 | 141533661 | 141533812 | 2 | 152 | 152 | 0  | 1     |
| IAD39139 | 438894 | LRP1B | chr2 | 141571220 | 141571380 | 2 | 161 | 161 | 0  | 1     |
| IAD39139 | 438871 | LRP1B | chr2 | 141597554 | 141597659 | 1 | 106 | 106 | 0  | 1     |
| IAD39139 | 438875 | LRP1B | chr2 | 141598481 | 141598666 | 3 | 186 | 175 | 11 | 0.941 |
| IAD39139 | 438920 | LRP1B | chr2 | 141607665 | 141607903 | 3 | 239 | 239 | 0  | 1     |
| IAD39139 | 438929 | LRP1B | chr2 | 141609215 | 141609357 | 2 | 143 | 143 | 0  | 1     |
| IAD39139 | 438954 | LRP1B | chr2 | 141625153 | 141625408 | 2 | 256 | 256 | 0  | 1     |
| IAD39139 | 438936 | LRP1B | chr2 | 141625662 | 141625837 | 2 | 176 | 148 | 28 | 0.841 |
| IAD39139 | 438934 | LRP1B | chr2 | 141641380 | 141641595 | 2 | 216 | 216 | 0  | 1     |
| IAD39139 | 438884 | LRP1B | chr2 | 141643701 | 141643909 | 2 | 209 | 180 | 29 | 0.861 |
| IAD39139 | 438885 | LRP1B | chr2 | 141660483 | 141660739 | 2 | 257 | 249 | 8  | 0.969 |
| IAD39139 | 438904 | LRP1B | chr2 | 141665440 | 141665651 | 2 | 212 | 212 | 0  | 1     |
| IAD39139 | 438946 | LRP1B | chr2 | 141680528 | 141680721 | 2 | 194 | 194 | 0  | 1     |
| IAD39139 | 438938 | LRP1B | chr2 | 141707798 | 141707976 | 2 | 179 | 179 | 0  | 1     |
| IAD39139 | 438880 | LRP1B | chr2 | 141709423 | 141709514 | 1 | 92  | 92  | 0  | 1     |
| IAD39139 | 438947 | LRP1B | chr2 | 141739723 | 141739850 | 2 | 128 | 128 | 0  | 1     |
| IAD39139 | 438952 | LRP1B | chr2 | 141747095 | 141747231 | 2 | 137 | 137 | 0  | 1     |
| IAD39139 | 438933 | LRP1B | chr2 | 141751558 | 141751709 | 2 | 152 | 152 | 0  | 1     |
| IAD39139 | 438883 | LRP1B | chr2 | 141762898 | 141763031 | 1 | 134 | 134 | 0  | 1     |
| IAD39139 | 438890 | LRP1B | chr2 | 141771119 | 141771319 | 2 | 201 | 201 | 0  | 1     |
| IAD39139 | 438921 | LRP1B | chr2 | 141773259 | 141773489 | 2 | 231 | 231 | 0  | 1     |
| IAD39139 | 438935 | LRP1B | chr2 | 141777485 | 141777676 | 3 | 192 | 192 | 0  | 1     |
| IAD39139 | 438896 | LRP1B | chr2 | 141806549 | 141806796 | 2 | 248 | 248 | 0  | 1     |
| IAD39139 | 438877 | LRP1B | chr2 | 141812679 | 141812833 | 1 | 155 | 155 | 0  | 1     |
| IAD39139 | 438948 | LRP1B | chr2 | 141816446 | 141816628 | 2 | 183 | 183 | 0  | 1     |

|          |        |       |      |           |           |    |      |      |    |       |
|----------|--------|-------|------|-----------|-----------|----|------|------|----|-------|
| IAD39139 | 438891 | LRP1B | chr2 | 141819614 | 141819847 | 2  | 234  | 234  | 0  | 1     |
| IAD39139 | 438910 | LRP1B | chr2 | 141945984 | 141946157 | 2  | 174  | 174  | 0  | 1     |
| IAD39139 | 438956 | LRP1B | chr2 | 141986746 | 141987014 | 3  | 269  | 223  | 46 | 0.829 |
| IAD39139 | 438899 | LRP1B | chr2 | 142004789 | 142004928 | 2  | 140  | 140  | 0  | 1     |
| IAD39139 | 438915 | LRP1B | chr2 | 142012085 | 142012215 | 2  | 131  | 108  | 23 | 0.824 |
| IAD39139 | 438917 | LRP1B | chr2 | 142237959 | 142238107 | 2  | 149  | 149  | 0  | 1     |
| IAD39139 | 438897 | LRP1B | chr2 | 142567842 | 142567975 | 1  | 134  | 134  | 0  | 1     |
| IAD39139 | 457629 | NR3C1 | chr5 | 142658923 | 142658981 | 1  | 59   | 59   | 0  | 1     |
| IAD39139 | 457625 | NR3C1 | chr5 | 142661448 | 142661611 | 2  | 164  | 164  | 0  | 1     |
| IAD39139 | 457633 | NR3C1 | chr5 | 142662127 | 142662295 | 2  | 169  | 148  | 21 | 0.876 |
| IAD39139 | 457622 | NR3C1 | chr5 | 142675011 | 142675160 | 2  | 150  | 150  | 0  | 1     |
| IAD39139 | 457624 | NR3C1 | chr5 | 142675019 | 142675160 | 2  | 142  | 142  | 0  | 1     |
| IAD39139 | 457631 | NR3C1 | chr5 | 142678227 | 142678382 | 1  | 156  | 156  | 0  | 1     |
| IAD39139 | 457630 | NR3C1 | chr5 | 142680044 | 142680333 | 3  | 290  | 290  | 0  | 1     |
| IAD39139 | 457627 | NR3C1 | chr5 | 142689656 | 142689783 | 1  | 128  | 128  | 0  | 1     |
| IAD39139 | 457632 | NR3C1 | chr5 | 142693558 | 142693738 | 2  | 181  | 181  | 0  | 1     |
| IAD39139 | 457620 | NR3C1 | chr5 | 142693561 | 142693738 | 2  | 178  | 178  | 0  | 1     |
| IAD39139 | 457623 | NR3C1 | chr5 | 142779215 | 142779404 | 3  | 190  | 190  | 0  | 1     |
| IAD39139 | 457637 | NR3C1 | chr5 | 142779215 | 142779419 | 3  | 205  | 205  | 0  | 1     |
| IAD39139 | 457626 | NR3C1 | chr5 | 142779215 | 142779464 | 3  | 250  | 250  | 0  | 1     |
| IAD39139 | 457635 | NR3C1 | chr5 | 142779215 | 142780118 | 7  | 904  | 904  | 0  | 1     |
| IAD39139 | 457628 | NR3C1 | chr5 | 142779215 | 142780142 | 7  | 928  | 928  | 0  | 1     |
| IAD39139 | 457621 | NR3C1 | chr5 | 142779215 | 142780154 | 8  | 940  | 940  | 0  | 1     |
| IAD39139 | 457636 | NR3C1 | chr5 | 142779215 | 142780331 | 9  | 1117 | 1117 | 0  | 1     |
| IAD39139 | 457634 | NR3C1 | chr5 | 142779215 | 142780409 | 9  | 1195 | 1195 | 0  | 1     |
| IAD39139 | 438944 | LRP1B | chr2 | 142888211 | 142888303 | 2  | 93   | 93   | 0  | 1     |
| IAD39139 | 433579 | MLL3  | chr7 | 151833911 | 151834014 | 1  | 104  | 104  | 0  | 1     |
| IAD39139 | 433550 | MLL3  | chr7 | 151835875 | 151835994 | 1  | 120  | 120  | 0  | 1     |
| IAD39139 | 433574 | MLL3  | chr7 | 151836265 | 151836349 | 1  | 85   | 85   | 0  | 1     |
| IAD39139 | 433542 | MLL3  | chr7 | 151836754 | 151836881 | 2  | 128  | 128  | 0  | 1     |
| IAD39139 | 433532 | MLL3  | chr7 | 151841792 | 151841971 | 2  | 180  | 180  | 0  | 1     |
| IAD39139 | 433568 | MLL3  | chr7 | 151842232 | 151842385 | 2  | 154  | 154  | 0  | 1     |
| IAD39139 | 433537 | MLL3  | chr7 | 151843678 | 151843825 | 2  | 148  | 148  | 0  | 1     |
| IAD39139 | 433554 | MLL3  | chr7 | 151845112 | 151846242 | 8  | 1131 | 1131 | 0  | 1     |
| IAD39139 | 433563 | MLL3  | chr7 | 151847979 | 151848097 | 1  | 119  | 119  | 0  | 1     |
| IAD39139 | 433529 | MLL3  | chr7 | 151848521 | 151848671 | 2  | 151  | 151  | 0  | 1     |
| IAD39139 | 433582 | MLL3  | chr7 | 151849784 | 151850044 | 3  | 261  | 261  | 0  | 1     |
| IAD39139 | 433567 | MLL3  | chr7 | 151851089 | 151851236 | 3  | 148  | 148  | 0  | 1     |
| IAD39139 | 433536 | MLL3  | chr7 | 151851346 | 151851535 | 2  | 190  | 190  | 0  | 1     |
| IAD39139 | 433580 | MLL3  | chr7 | 151852989 | 151853147 | 2  | 159  | 159  | 0  | 1     |
| IAD39139 | 433534 | MLL3  | chr7 | 151853284 | 151853436 | 1  | 153  | 149  | 4  | 0.974 |
| IAD39139 | 433575 | MLL3  | chr7 | 151855942 | 151856162 | 2  | 221  | 221  | 0  | 1     |
| IAD39139 | 433545 | MLL3  | chr7 | 151859196 | 151860916 | 12 | 1721 | 1721 | 0  | 1     |
| IAD39139 | 433562 | MLL3  | chr7 | 151864225 | 151864468 | 2  | 244  | 244  | 0  | 1     |
| IAD39139 | 433530 | MLL3  | chr7 | 151866265 | 151866339 | 2  | 75   | 75   | 0  | 1     |
| IAD39139 | 433558 | MLL3  | chr7 | 151868343 | 151868432 | 1  | 90   | 90   | 0  | 1     |
| IAD39139 | 433548 | MLL3  | chr7 | 151871210 | 151871332 | 2  | 123  | 123  | 0  | 1     |
| IAD39139 | 433544 | MLL3  | chr7 | 151873270 | 151875100 | 14 | 1831 | 1831 | 0  | 1     |
| IAD39139 | 433561 | MLL3  | chr7 | 151876913 | 151877216 | 3  | 304  | 304  | 0  | 1     |
| IAD39139 | 433541 | MLL3  | chr7 | 151877790 | 151879684 | 13 | 1895 | 1895 | 0  | 1     |
| IAD39139 | 433569 | MLL3  | chr7 | 151880053 | 151880246 | 3  | 194  | 194  | 0  | 1     |
| IAD39139 | 433539 | MLL3  | chr7 | 151882637 | 151882721 | 2  | 85   | 85   | 0  | 1     |
| IAD39139 | 433566 | MLL3  | chr7 | 151884341 | 151884566 | 3  | 226  | 226  | 0  | 1     |
| IAD39139 | 433581 | MLL3  | chr7 | 151884794 | 151884937 | 2  | 144  | 144  | 0  | 1     |
| IAD39139 | 433533 | MLL3  | chr7 | 151891088 | 151891218 | 2  | 131  | 131  | 0  | 1     |
| IAD39139 | 433547 | MLL3  | chr7 | 151891308 | 151891351 | 1  | 44   | 4    | 40 | 0.091 |
| IAD39139 | 433565 | MLL3  | chr7 | 151891519 | 151891658 | 2  | 140  | 140  | 0  | 1     |
| IAD39139 | 433531 | MLL3  | chr7 | 151892986 | 151893101 | 2  | 116  | 107  | 9  | 0.922 |
| IAD39139 | 433540 | MLL3  | chr7 | 151896358 | 151896549 | 2  | 192  | 192  | 0  | 1     |
| IAD39139 | 433527 | MLL3  | chr7 | 151900013 | 151900154 | 2  | 142  | 142  | 0  | 1     |
| IAD39139 | 433556 | MLL3  | chr7 | 151902185 | 151902315 | 2  | 131  | 131  | 0  | 1     |

|          |        |      |      |           |           |   |     |     |     |       |
|----------|--------|------|------|-----------|-----------|---|-----|-----|-----|-------|
| IAD39139 | 433535 | MLL3 | chr7 | 151904379 | 151904518 | 2 | 140 | 140 | 0   | 1     |
| IAD39139 | 433583 | MLL3 | chr7 | 151917602 | 151917825 | 3 | 224 | 224 | 0   | 1     |
| IAD39139 | 433549 | MLL3 | chr7 | 151919080 | 151919156 | 1 | 77  | 77  | 0   | 1     |
| IAD39139 | 433570 | MLL3 | chr7 | 151919652 | 151919772 | 2 | 121 | 121 | 0   | 1     |
| IAD39139 | 433526 | MLL3 | chr7 | 151921094 | 151921269 | 3 | 176 | 162 | 14  | 0.92  |
| IAD39139 | 433578 | MLL3 | chr7 | 151921514 | 151921706 | 2 | 193 | 193 | 0   | 1     |
| IAD39139 | 433577 | MLL3 | chr7 | 151927002 | 151927117 | 1 | 116 | 15  | 101 | 0.129 |
| IAD39139 | 433572 | MLL3 | chr7 | 151927299 | 151927411 | 2 | 113 | 113 | 0   | 1     |
| IAD39139 | 433543 | MLL3 | chr7 | 151932896 | 151933023 | 2 | 128 | 128 | 0   | 1     |
| IAD39139 | 433560 | MLL3 | chr7 | 151935786 | 151935916 | 2 | 131 | 131 | 0   | 1     |
| IAD39139 | 433525 | MLL3 | chr7 | 151944981 | 151945710 | 6 | 730 | 730 | 0   | 1     |
| IAD39139 | 433555 | MLL3 | chr7 | 151946955 | 151947043 | 1 | 89  | 89  | 0   | 1     |
| IAD39139 | 433546 | MLL3 | chr7 | 151947932 | 151948056 | 2 | 125 | 125 | 0   | 1     |
| IAD39139 | 433571 | MLL3 | chr7 | 151949018 | 151949180 | 2 | 163 | 163 | 0   | 1     |
| IAD39139 | 433551 | MLL3 | chr7 | 151949625 | 151949805 | 2 | 181 | 181 | 0   | 1     |
| IAD39139 | 433576 | MLL3 | chr7 | 151960095 | 151960220 | 2 | 126 | 126 | 0   | 1     |
| IAD39139 | 433553 | MLL3 | chr7 | 151962117 | 151962299 | 2 | 183 | 183 | 0   | 1     |
| IAD39139 | 433564 | MLL3 | chr7 | 151970784 | 151970957 | 3 | 174 | 174 | 0   | 1     |
| IAD39139 | 433528 | MLL3 | chr7 | 152007045 | 152007165 | 2 | 121 | 121 | 0   | 1     |
| IAD39139 | 433538 | MLL3 | chr7 | 152008877 | 152009036 | 2 | 160 | 160 | 0   | 1     |
| IAD39139 | 433559 | MLL3 | chr7 | 152012217 | 152012428 | 2 | 212 | 212 | 0   | 1     |
| IAD39139 | 433552 | MLL3 | chr7 | 152027680 | 152027829 | 2 | 150 | 150 | 0   | 1     |
| IAD39139 | 433573 | MLL3 | chr7 | 152055666 | 152055765 | 2 | 100 | 100 | 0   | 1     |
| IAD39139 | 433557 | MLL3 | chr7 | 152132705 | 152132876 | 2 | 172 | 171 | 1   | 0.994 |
| IAD39139 | 453293 | NEB  | chr2 | 152342268 | 152342452 | 2 | 185 | 185 | 0   | 1     |
| IAD39139 | 453330 | NEB  | chr2 | 152346479 | 152346596 | 2 | 118 | 118 | 0   | 1     |
| IAD39139 | 453436 | NEB  | chr2 | 152346880 | 152347037 | 1 | 158 | 158 | 0   | 1     |
| IAD39139 | 453435 | NEB  | chr2 | 152348191 | 152348294 | 1 | 104 | 104 | 0   | 1     |
| IAD39139 | 453438 | NEB  | chr2 | 152348606 | 152348800 | 2 | 195 | 195 | 0   | 1     |
| IAD39139 | 453406 | NEB  | chr2 | 152348895 | 152349013 | 1 | 119 | 119 | 0   | 1     |
| IAD39139 | 453315 | NEB  | chr2 | 152349861 | 152349964 | 1 | 104 | 104 | 0   | 1     |
| IAD39139 | 453351 | NEB  | chr2 | 152350283 | 152350386 | 1 | 104 | 104 | 0   | 1     |
| IAD39139 | 453386 | NEB  | chr2 | 152350669 | 152350772 | 1 | 104 | 104 | 0   | 1     |
| IAD39139 | 453341 | NEB  | chr2 | 152352784 | 152352887 | 1 | 104 | 95  | 9   | 0.913 |
| IAD39139 | 453336 | NEB  | chr2 | 152353449 | 152353552 | 2 | 104 | 104 | 0   | 1     |
| IAD39139 | 453292 | NEB  | chr2 | 152354134 | 152354237 | 2 | 104 | 104 | 0   | 1     |
| IAD39139 | 453299 | NEB  | chr2 | 152354768 | 152354871 | 1 | 104 | 89  | 15  | 0.856 |
| IAD39139 | 453399 | NEB  | chr2 | 152355806 | 152355909 | 2 | 104 | 104 | 0   | 1     |
| IAD39139 | 453356 | NEB  | chr2 | 152357899 | 152358002 | 1 | 104 | 104 | 0   | 1     |
| IAD39139 | 453441 | NEB  | chr2 | 152359301 | 152359404 | 2 | 104 | 104 | 0   | 1     |
| IAD39139 | 453314 | NEB  | chr2 | 152359857 | 152359960 | 2 | 104 | 104 | 0   | 1     |
| IAD39139 | 453295 | NEB  | chr2 | 152361986 | 152362089 | 1 | 104 | 104 | 0   | 1     |
| IAD39139 | 453415 | NEB  | chr2 | 152362674 | 152362777 | 1 | 104 | 104 | 0   | 1     |
| IAD39139 | 453335 | NEB  | chr2 | 152363417 | 152363532 | 2 | 116 | 116 | 0   | 1     |
| IAD39139 | 453297 | NEB  | chr2 | 152364513 | 152364628 | 1 | 116 | 116 | 0   | 1     |
| IAD39139 | 453309 | NEB  | chr2 | 152369241 | 152369356 | 1 | 116 | 116 | 0   | 1     |
| IAD39139 | 453302 | NEB  | chr2 | 152370088 | 152370212 | 2 | 125 | 125 | 0   | 1     |
| IAD39139 | 453376 | NEB  | chr2 | 152370826 | 152370947 | 1 | 122 | 122 | 0   | 1     |
| IAD39139 | 453404 | NEB  | chr2 | 152371326 | 152371447 | 2 | 122 | 122 | 0   | 1     |
| IAD39139 | 453412 | NEB  | chr2 | 152372967 | 152373082 | 1 | 116 | 116 | 0   | 1     |
| IAD39139 | 453328 | NEB  | chr2 | 152374826 | 152374941 | 1 | 116 | 116 | 0   | 1     |
| IAD39139 | 453350 | NEB  | chr2 | 152375473 | 152375588 | 1 | 116 | 116 | 0   | 1     |
| IAD39139 | 453423 | NEB  | chr2 | 152376166 | 152376287 | 1 | 122 | 94  | 28  | 0.77  |
| IAD39139 | 453463 | NEB  | chr2 | 152380819 | 152380934 | 1 | 116 | 116 | 0   | 1     |
| IAD39139 | 453392 | NEB  | chr2 | 152381023 | 152381135 | 1 | 113 | 113 | 0   | 1     |
| IAD39139 | 453329 | NEB  | chr2 | 152381671 | 152381792 | 1 | 122 | 122 | 0   | 1     |
| IAD39139 | 453364 | NEB  | chr2 | 152382466 | 152382587 | 1 | 122 | 122 | 0   | 1     |
| IAD39139 | 453372 | NEB  | chr2 | 152382666 | 152382781 | 1 | 116 | 116 | 0   | 1     |
| IAD39139 | 453462 | NEB  | chr2 | 152383426 | 152383541 | 1 | 116 | 116 | 0   | 1     |
| IAD39139 | 453296 | NEB  | chr2 | 152383989 | 152384104 | 1 | 116 | 116 | 0   | 1     |
| IAD39139 | 453414 | NEB  | chr2 | 152385718 | 152385833 | 2 | 116 | 116 | 0   | 1     |

|          |        |     |      |           |           |   |     |     |     |       |
|----------|--------|-----|------|-----------|-----------|---|-----|-----|-----|-------|
| IAD39139 | 453380 | NEB | chr2 | 152387502 | 152387620 | 1 | 119 | 119 | 0   | 1     |
| IAD39139 | 453317 | NEB | chr2 | 152388300 | 152388415 | 1 | 116 | 116 | 0   | 1     |
| IAD39139 | 453442 | NEB | chr2 | 152389950 | 152390065 | 1 | 116 | 116 | 0   | 1     |
| IAD39139 | 453413 | NEB | chr2 | 152390723 | 152390838 | 1 | 116 | 116 | 0   | 1     |
| IAD39139 | 453393 | NEB | chr2 | 152392199 | 152392314 | 1 | 116 | 116 | 0   | 1     |
| IAD39139 | 453405 | NEB | chr2 | 152393640 | 152393755 | 1 | 116 | 116 | 0   | 1     |
| IAD39139 | 453324 | NEB | chr2 | 152394380 | 152394495 | 2 | 116 | 116 | 0   | 1     |
| IAD39139 | 453321 | NEB | chr2 | 152394648 | 152394763 | 1 | 116 | 116 | 0   | 1     |
| IAD39139 | 453398 | NEB | chr2 | 152396852 | 152396967 | 1 | 116 | 116 | 0   | 1     |
| IAD39139 | 453446 | NEB | chr2 | 152397205 | 152397320 | 1 | 116 | 116 | 0   | 1     |
| IAD39139 | 453466 | NEB | chr2 | 152397955 | 152398070 | 1 | 116 | 116 | 0   | 1     |
| IAD39139 | 453450 | NEB | chr2 | 152402396 | 152402517 | 2 | 122 | 122 | 0   | 1     |
| IAD39139 | 453333 | NEB | chr2 | 152402853 | 152402962 | 1 | 110 | 110 | 0   | 1     |
| IAD39139 | 453397 | NEB | chr2 | 152403937 | 152404052 | 1 | 116 | 116 | 0   | 1     |
| IAD39139 | 453349 | NEB | chr2 | 152404142 | 152404257 | 1 | 116 | 116 | 0   | 1     |
| IAD39139 | 453426 | NEB | chr2 | 152404816 | 152404934 | 1 | 119 | 119 | 0   | 1     |
| IAD39139 | 453334 | NEB | chr2 | 152406144 | 152406259 | 1 | 116 | 116 | 0   | 1     |
| IAD39139 | 453391 | NEB | chr2 | 152408246 | 152408364 | 1 | 119 | 119 | 0   | 1     |
| IAD39139 | 453287 | NEB | chr2 | 152409180 | 152409295 | 1 | 116 | 116 | 0   | 1     |
| IAD39139 | 453420 | NEB | chr2 | 152409906 | 152410021 | 2 | 116 | 116 | 0   | 1     |
| IAD39139 | 453387 | NEB | chr2 | 152410336 | 152410544 | 2 | 209 | 209 | 0   | 1     |
| IAD39139 | 453306 | NEB | chr2 | 152411439 | 152411563 | 1 | 125 | 98  | 27  | 0.784 |
| IAD39139 | 453340 | NEB | chr2 | 152417100 | 152417218 | 1 | 119 | 119 | 0   | 1     |
| IAD39139 | 453291 | NEB | chr2 | 152417512 | 152417627 | 1 | 116 | 116 | 0   | 1     |
| IAD39139 | 453332 | NEB | chr2 | 152417716 | 152417831 | 1 | 116 | 116 | 0   | 1     |
| IAD39139 | 453378 | NEB | chr2 | 152418618 | 152418733 | 1 | 116 | 116 | 0   | 1     |
| IAD39139 | 453367 | NEB | chr2 | 152419119 | 152419327 | 2 | 209 | 209 | 0   | 1     |
| IAD39139 | 453360 | NEB | chr2 | 152420114 | 152420238 | 1 | 125 | 125 | 0   | 1     |
| IAD39139 | 453357 | NEB | chr2 | 152420331 | 152420449 | 1 | 119 | 119 | 0   | 1     |
| IAD39139 | 453411 | NEB | chr2 | 152421552 | 152421667 | 2 | 116 | 116 | 0   | 1     |
| IAD39139 | 453389 | NEB | chr2 | 152422009 | 152422124 | 1 | 116 | 116 | 0   | 1     |
| IAD39139 | 453410 | NEB | chr2 | 152422224 | 152422339 | 1 | 116 | 116 | 0   | 1     |
| IAD39139 | 453448 | NEB | chr2 | 152423676 | 152423998 | 3 | 323 | 323 | 0   | 1     |
| IAD39139 | 453322 | NEB | chr2 | 152424579 | 152424697 | 1 | 119 | 119 | 0   | 1     |
| IAD39139 | 453396 | NEB | chr2 | 152424824 | 152424936 | 1 | 113 | 113 | 0   | 1     |
| IAD39139 | 453294 | NEB | chr2 | 152425126 | 152425235 | 1 | 110 | 110 | 0   | 1     |
| IAD39139 | 453325 | NEB | chr2 | 152425776 | 152425891 | 1 | 116 | 116 | 0   | 1     |
| IAD39139 | 453370 | NEB | chr2 | 152426589 | 152426911 | 2 | 323 | 323 | 0   | 1     |
| IAD39139 | 453390 | NEB | chr2 | 152427005 | 152427120 | 1 | 116 | 116 | 0   | 1     |
| IAD39139 | 453313 | NEB | chr2 | 152432203 | 152432318 | 1 | 116 | 116 | 0   | 1     |
| IAD39139 | 453327 | NEB | chr2 | 152432659 | 152432873 | 3 | 215 | 215 | 0   | 1     |
| IAD39139 | 453394 | NEB | chr2 | 152435846 | 152436168 | 2 | 323 | 269 | 54  | 0.833 |
| IAD39139 | 453444 | NEB | chr2 | 152437305 | 152437423 | 0 | 119 | 0   | 119 | 0     |
| IAD39139 | 453377 | NEB | chr2 | 152437991 | 152438106 | 0 | 116 | 0   | 116 | 0     |
| IAD39139 | 453407 | NEB | chr2 | 152438972 | 152439186 | 0 | 215 | 0   | 215 | 0     |
| IAD39139 | 453416 | NEB | chr2 | 152439963 | 152440285 | 1 | 323 | 24  | 299 | 0.074 |
| IAD39139 | 453437 | NEB | chr2 | 152442015 | 152442133 | 0 | 119 | 0   | 119 | 0     |
| IAD39139 | 453432 | NEB | chr2 | 152442913 | 152443028 | 0 | 116 | 0   | 116 | 0     |
| IAD39139 | 453308 | NEB | chr2 | 152443882 | 152444096 | 0 | 215 | 0   | 215 | 0     |
| IAD39139 | 453366 | NEB | chr2 | 152446397 | 152446719 | 0 | 323 | 0   | 323 | 0     |
| IAD39139 | 453303 | NEB | chr2 | 152447856 | 152447974 | 2 | 119 | 112 | 7   | 0.941 |
| IAD39139 | 453300 | NEB | chr2 | 152448542 | 152448657 | 2 | 116 | 116 | 0   | 1     |
| IAD39139 | 453434 | NEB | chr2 | 152449524 | 152449738 | 0 | 215 | 0   | 215 | 0     |
| IAD39139 | 453331 | NEB | chr2 | 152450515 | 152450837 | 1 | 323 | 100 | 223 | 0.31  |
| IAD39139 | 453320 | NEB | chr2 | 152452568 | 152452686 | 0 | 119 | 0   | 119 | 0     |
| IAD39139 | 453348 | NEB | chr2 | 152453466 | 152453581 | 0 | 116 | 0   | 116 | 0     |
| IAD39139 | 453346 | NEB | chr2 | 152454435 | 152454649 | 0 | 215 | 0   | 215 | 0     |
| IAD39139 | 453456 | NEB | chr2 | 152456950 | 152457272 | 0 | 323 | 0   | 323 | 0     |
| IAD39139 | 453382 | NEB | chr2 | 152458409 | 152458527 | 0 | 119 | 0   | 119 | 0     |
| IAD39139 | 453305 | NEB | chr2 | 152459095 | 152459210 | 0 | 116 | 0   | 116 | 0     |
| IAD39139 | 453395 | NEB | chr2 | 152460077 | 152460291 | 2 | 215 | 163 | 52  | 0.758 |

|          |        |     |      |           |           |   |     |     |     |       |
|----------|--------|-----|------|-----------|-----------|---|-----|-----|-----|-------|
| IAD39139 | 453430 | NEB | chr2 | 152461068 | 152461390 | 0 | 323 | 0   | 323 | 0     |
| IAD39139 | 453447 | NEB | chr2 | 152463114 | 152463232 | 2 | 119 | 110 | 9   | 0.924 |
| IAD39139 | 453455 | NEB | chr2 | 152464012 | 152464127 | 1 | 116 | 116 | 0   | 1     |
| IAD39139 | 453431 | NEB | chr2 | 152464981 | 152465195 | 0 | 215 | 0   | 215 | 0     |
| IAD39139 | 453323 | NEB | chr2 | 152466317 | 152466639 | 2 | 323 | 323 | 0   | 1     |
| IAD39139 | 453453 | NEB | chr2 | 152467024 | 152467142 | 2 | 119 | 119 | 0   | 1     |
| IAD39139 | 453440 | NEB | chr2 | 152467270 | 152467385 | 2 | 116 | 116 | 0   | 1     |
| IAD39139 | 453401 | NEB | chr2 | 152468694 | 152468908 | 2 | 215 | 215 | 0   | 1     |
| IAD39139 | 453319 | NEB | chr2 | 152470784 | 152471106 | 3 | 323 | 291 | 32  | 0.901 |
| IAD39139 | 453467 | NEB | chr2 | 152472510 | 152472628 | 2 | 119 | 119 | 0   | 1     |
| IAD39139 | 453427 | NEB | chr2 | 152473872 | 152473987 | 2 | 116 | 116 | 0   | 1     |
| IAD39139 | 453402 | NEB | chr2 | 152474783 | 152474997 | 2 | 215 | 215 | 0   | 1     |
| IAD39139 | 453298 | NEB | chr2 | 152475959 | 152476281 | 3 | 323 | 323 | 0   | 1     |
| IAD39139 | 453354 | NEB | chr2 | 152477427 | 152477545 | 2 | 119 | 119 | 0   | 1     |
| IAD39139 | 453318 | NEB | chr2 | 152482042 | 152482157 | 1 | 116 | 116 | 0   | 1     |
| IAD39139 | 453417 | NEB | chr2 | 152483510 | 152483724 | 2 | 215 | 215 | 0   | 1     |
| IAD39139 | 453408 | NEB | chr2 | 152484031 | 152484353 | 3 | 323 | 323 | 0   | 1     |
| IAD39139 | 453311 | NEB | chr2 | 152486047 | 152486165 | 1 | 119 | 119 | 0   | 1     |
| IAD39139 | 453316 | NEB | chr2 | 152487223 | 152487338 | 2 | 116 | 116 | 0   | 1     |
| IAD39139 | 453385 | NEB | chr2 | 152487651 | 152487865 | 2 | 215 | 215 | 0   | 1     |
| IAD39139 | 453464 | NEB | chr2 | 152490162 | 152490484 | 3 | 323 | 323 | 0   | 1     |
| IAD39139 | 453388 | NEB | chr2 | 152492735 | 152492853 | 2 | 119 | 119 | 0   | 1     |
| IAD39139 | 453369 | NEB | chr2 | 152495788 | 152495903 | 2 | 116 | 116 | 0   | 1     |
| IAD39139 | 453458 | NEB | chr2 | 152496401 | 152496579 | 2 | 179 | 179 | 0   | 1     |
| IAD39139 | 453374 | NEB | chr2 | 152496365 | 152496579 | 2 | 215 | 215 | 0   | 1     |
| IAD39139 | 453425 | NEB | chr2 | 152496863 | 152497185 | 3 | 323 | 323 | 0   | 1     |
| IAD39139 | 453409 | NEB | chr2 | 152499082 | 152499200 | 1 | 119 | 119 | 0   | 1     |
| IAD39139 | 453358 | NEB | chr2 | 152499273 | 152499388 | 1 | 116 | 116 | 0   | 1     |
| IAD39139 | 453338 | NEB | chr2 | 152499658 | 152499872 | 2 | 215 | 209 | 6   | 0.972 |
| IAD39139 | 453312 | NEB | chr2 | 152500326 | 152500648 | 3 | 323 | 323 | 0   | 1     |
| IAD39139 | 453460 | NEB | chr2 | 152500976 | 152501094 | 2 | 119 | 119 | 0   | 1     |
| IAD39139 | 453286 | NEB | chr2 | 152502638 | 152502753 | 1 | 116 | 116 | 0   | 1     |
| IAD39139 | 453362 | NEB | chr2 | 152506684 | 152506898 | 2 | 215 | 215 | 0   | 1     |
| IAD39139 | 453379 | NEB | chr2 | 152507082 | 152507404 | 3 | 323 | 323 | 0   | 1     |
| IAD39139 | 453347 | NEB | chr2 | 152510500 | 152510618 | 2 | 119 | 119 | 0   | 1     |
| IAD39139 | 453288 | NEB | chr2 | 152511778 | 152511893 | 2 | 116 | 116 | 0   | 1     |
| IAD39139 | 453384 | NEB | chr2 | 152512325 | 152512542 | 3 | 218 | 218 | 0   | 1     |
| IAD39139 | 453368 | NEB | chr2 | 152512661 | 152512983 | 3 | 323 | 323 | 0   | 1     |
| IAD39139 | 453419 | NEB | chr2 | 152514491 | 152514609 | 1 | 119 | 119 | 0   | 1     |
| IAD39139 | 453373 | NEB | chr2 | 152515573 | 152515688 | 1 | 116 | 116 | 0   | 1     |
| IAD39139 | 453361 | NEB | chr2 | 152518643 | 152518860 | 2 | 218 | 218 | 0   | 1     |
| IAD39139 | 453365 | NEB | chr2 | 152520056 | 152520378 | 3 | 323 | 323 | 0   | 1     |
| IAD39139 | 453337 | NEB | chr2 | 152521009 | 152521127 | 1 | 119 | 119 | 0   | 1     |
| IAD39139 | 453422 | NEB | chr2 | 152521267 | 152521382 | 1 | 116 | 116 | 0   | 1     |
| IAD39139 | 453353 | NEB | chr2 | 152521841 | 152522058 | 2 | 218 | 218 | 0   | 1     |
| IAD39139 | 453421 | NEB | chr2 | 152522598 | 152522920 | 2 | 323 | 323 | 0   | 1     |
| IAD39139 | 453403 | NEB | chr2 | 152524312 | 152524430 | 1 | 119 | 76  | 43  | 0.639 |
| IAD39139 | 453443 | NEB | chr2 | 152525535 | 152525650 | 1 | 116 | 116 | 0   | 1     |
| IAD39139 | 453461 | NEB | chr2 | 152527531 | 152527748 | 2 | 218 | 218 | 0   | 1     |
| IAD39139 | 453451 | NEB | chr2 | 152528877 | 152529199 | 2 | 323 | 323 | 0   | 1     |
| IAD39139 | 453359 | NEB | chr2 | 152530985 | 152531103 | 1 | 119 | 119 | 0   | 1     |
| IAD39139 | 453307 | NEB | chr2 | 152531795 | 152531910 | 2 | 116 | 115 | 1   | 0.991 |
| IAD39139 | 453433 | NEB | chr2 | 152534073 | 152534290 | 2 | 218 | 218 | 0   | 1     |
| IAD39139 | 453352 | NEB | chr2 | 152534384 | 152534706 | 3 | 323 | 323 | 0   | 1     |
| IAD39139 | 453383 | NEB | chr2 | 152536229 | 152536347 | 2 | 119 | 119 | 0   | 1     |
| IAD39139 | 453418 | NEB | chr2 | 152536426 | 152536541 | 2 | 116 | 116 | 0   | 1     |
| IAD39139 | 453445 | NEB | chr2 | 152537238 | 152537347 | 2 | 110 | 110 | 0   | 1     |
| IAD39139 | 453344 | NEB | chr2 | 152539170 | 152539288 | 1 | 119 | 119 | 0   | 1     |
| IAD39139 | 453310 | NEB | chr2 | 152541286 | 152541494 | 2 | 209 | 209 | 0   | 1     |
| IAD39139 | 453290 | NEB | chr2 | 152543927 | 152544051 | 1 | 125 | 125 | 0   | 1     |
| IAD39139 | 453301 | NEB | chr2 | 152544134 | 152544252 | 1 | 119 | 119 | 0   | 1     |

|          |        |       |      |           |           |    |      |      |    |        |
|----------|--------|-------|------|-----------|-----------|----|------|------|----|--------|
| IAD39139 | 453375 | NEB   | chr2 | 152544800 | 152544915 | 1  | 116  | 116  | 0  | 1      |
| IAD39139 | 453452 | NEB   | chr2 | 152547235 | 152547344 | 1  | 110  | 110  | 0  | 1      |
| IAD39139 | 453449 | NEB   | chr2 | 152548372 | 152548487 | 1  | 116  | 116  | 0  | 1      |
| IAD39139 | 453343 | NEB   | chr2 | 152548567 | 152548685 | 1  | 119  | 119  | 0  | 1      |
| IAD39139 | 453339 | NEB   | chr2 | 152548769 | 152548881 | 1  | 113  | 113  | 0  | 1      |
| IAD39139 | 453363 | NEB   | chr2 | 152550831 | 152550955 | 1  | 125  | 125  | 0  | 1      |
| IAD39139 | 453326 | NEB   | chr2 | 152551030 | 152551148 | 1  | 119  | 119  | 0  | 1      |
| IAD39139 | 453371 | NEB   | chr2 | 152552086 | 152552201 | 2  | 116  | 116  | 0  | 1      |
| IAD39139 | 453342 | NEB   | chr2 | 152553145 | 152553254 | 1  | 110  | 110  | 0  | 1      |
| IAD39139 | 453400 | NEB   | chr2 | 152553656 | 152553771 | 1  | 116  | 116  | 0  | 1      |
| IAD39139 | 453457 | NEB   | chr2 | 152553858 | 152553976 | 2  | 119  | 119  | 0  | 1      |
| IAD39139 | 453429 | NEB   | chr2 | 152554052 | 152554167 | 1  | 116  | 92   | 24 | 0.793  |
| IAD39139 | 453459 | NEB   | chr2 | 152563389 | 152563516 | 2  | 128  | 128  | 0  | 1      |
| IAD39139 | 453381 | NEB   | chr2 | 152566164 | 152566282 | 1  | 119  | 119  | 0  | 1      |
| IAD39139 | 453454 | NEB   | chr2 | 152566942 | 152567057 | 2  | 116  | 116  | 0  | 1      |
| IAD39139 | 453289 | NEB   | chr2 | 152573924 | 152574039 | 2  | 116  | 116  | 0  | 1      |
| IAD39139 | 453424 | NEB   | chr2 | 152579890 | 152580005 | 1  | 116  | 116  | 0  | 1      |
| IAD39139 | 453304 | NEB   | chr2 | 152580768 | 152580883 | 1  | 116  | 116  | 0  | 1      |
| IAD39139 | 453345 | NEB   | chr2 | 152581365 | 152581480 | 1  | 116  | 116  | 0  | 1      |
| IAD39139 | 453439 | NEB   | chr2 | 152581961 | 152582079 | 1  | 119  | 119  | 0  | 1      |
| IAD39139 | 453465 | NEB   | chr2 | 152584199 | 152584425 | 2  | 227  | 227  | 0  | 1      |
| IAD39139 | 453355 | NEB   | chr2 | 152586123 | 152586175 | 1  | 53   | 53   | 0  | 1      |
| IAD39139 | 453428 | NEB   | chr2 | 152589629 | 152589675 | 1  | 47   | 47   | 0  | 1      |
| IAD39139 | 468600 | MECOM | chr3 | 168802691 | 168802836 | 1  | 146  | 146  | 0  | 1      |
| IAD39139 | 468599 | MECOM | chr3 | 168806782 | 168806976 | 2  | 195  | 189  | 6  | 0.969  |
| IAD39139 | 468604 | MECOM | chr3 | 168807782 | 168808029 | 2  | 248  | 248  | 0  | 1      |
| IAD39139 | 468598 | MECOM | chr3 | 168810740 | 168810895 | 2  | 156  | 156  | 0  | 1      |
| IAD39139 | 468596 | MECOM | chr3 | 168812858 | 168813038 | 3  | 181  | 181  | 0  | 1      |
| IAD39139 | 468588 | MECOM | chr3 | 168818667 | 168818755 | 2  | 89   | 89   | 0  | 1      |
| IAD39139 | 468591 | MECOM | chr3 | 168819842 | 168820019 | 2  | 178  | 178  | 0  | 1      |
| IAD39139 | 468595 | MECOM | chr3 | 168825708 | 168825745 | 2  | 38   | 38   | 0  | 1      |
| IAD39139 | 468592 | MECOM | chr3 | 168830569 | 168830667 | 1  | 99   | 99   | 0  | 1      |
| IAD39139 | 468587 | MECOM | chr3 | 168833165 | 168834532 | 9  | 1368 | 1368 | 0  | 1      |
| IAD39139 | 468602 | MECOM | chr3 | 168838838 | 168839002 | 2  | 165  | 165  | 0  | 1      |
| IAD39139 | 468603 | MECOM | chr3 | 168838838 | 168839005 | 2  | 168  | 168  | 0  | 1      |
| IAD39139 | 468589 | MECOM | chr3 | 168840362 | 168840520 | 2  | 159  | 159  | 0  | 1      |
| IAD39139 | 468586 | MECOM | chr3 | 168845626 | 168845853 | 2  | 228  | 228  | 0  | 1      |
| IAD39139 | 468601 | MECOM | chr3 | 168849211 | 168849270 | 1  | 60   | 60   | 0  | 1      |
| IAD39139 | 468590 | MECOM | chr3 | 168849211 | 168849324 | 1  | 114  | 114  | 0  | 1      |
| IAD39139 | 468593 | MECOM | chr3 | 168861480 | 168861625 | 1  | 146  | 146  | 0  | 1      |
| IAD39139 | 468597 | MECOM | chr3 | 168862779 | 168862792 | 1  | 14   | 14   | 0  | 1      |
| IAD39139 | 468594 | MECOM | chr3 | 169098969 | 169099317 | 3  | 349  | 349  | 0  | 1      |
| IAD39139 | 468585 | MECOM | chr3 | 169381118 | 169381165 | 1  | 48   | 45   | 3  | 0.938  |
| IAD39139 | 423583 | FAT1  | chr4 | 187509740 | 187510379 | 5  | 640  | 640  | 0  | 1      |
| IAD39139 | 423588 | FAT1  | chr4 | 187516837 | 187516985 | 1  | 149  | 149  | 0  | 1      |
| IAD39139 | 423592 | FAT1  | chr4 | 187517688 | 187518330 | 5  | 643  | 643  | 0  | 1      |
| IAD39139 | 423585 | FAT1  | chr4 | 187518830 | 187518951 | 2  | 122  | 122  | 0  | 1      |
| IAD39139 | 423600 | FAT1  | chr4 | 187519120 | 187519284 | 2  | 165  | 165  | 0  | 1      |
| IAD39139 | 423593 | FAT1  | chr4 | 187521046 | 187521519 | 3  | 474  | 474  | 0  | 1      |
| IAD39139 | 423589 | FAT1  | chr4 | 187522417 | 187522585 | 2  | 169  | 169  | 0  | 1      |
| IAD39139 | 423586 | FAT1  | chr4 | 187524051 | 187524193 | 2  | 143  | 143  | 0  | 1      |
| IAD39139 | 423595 | FAT1  | chr4 | 187524324 | 187525136 | 5  | 813  | 813  | 0  | 1      |
| IAD39139 | 423599 | FAT1  | chr4 | 187525525 | 187525733 | 2  | 209  | 209  | 0  | 1      |
| IAD39139 | 423594 | FAT1  | chr4 | 187527218 | 187527372 | 1  | 155  | 155  | 0  | 1      |
| IAD39139 | 423601 | FAT1  | chr4 | 187530331 | 187530479 | 2  | 149  | 149  | 0  | 1      |
| IAD39139 | 423591 | FAT1  | chr4 | 187530949 | 187531174 | 2  | 226  | 226  | 0  | 1      |
| IAD39139 | 423578 | FAT1  | chr4 | 187532534 | 187532934 | 3  | 401  | 395  | 6  | 0.985  |
| IAD39139 | 423577 | FAT1  | chr4 | 187534257 | 187534501 | 2  | 245  | 245  | 0  | 1      |
| IAD39139 | 423587 | FAT1  | chr4 | 187535339 | 187535503 | 2  | 165  | 165  | 0  | 1      |
| IAD39139 | 423584 | FAT1  | chr4 | 187538153 | 187538360 | 2  | 208  | 208  | 0  | 1      |
| IAD39139 | 423579 | FAT1  | chr4 | 187538856 | 187542934 | 28 | 4079 | 4073 | 6  | 0.9985 |

|          |        |        |      |           |           |    |      |      |     |       |
|----------|--------|--------|------|-----------|-----------|----|------|------|-----|-------|
| IAD39139 | 423580 | FAT1   | chr4 | 187549302 | 187549523 | 3  | 222  | 222  | 0   | 1     |
| IAD39139 | 423582 | FAT1   | chr4 | 187549636 | 187549922 | 3  | 287  | 287  | 0   | 1     |
| IAD39139 | 423581 | FAT1   | chr4 | 187554832 | 187554982 | 1  | 151  | 151  | 0   | 1     |
| IAD39139 | 423598 | FAT1   | chr4 | 187557173 | 187557394 | 2  | 222  | 222  | 0   | 1     |
| IAD39139 | 423602 | FAT1   | chr4 | 187557733 | 187558073 | 4  | 341  | 341  | 0   | 1     |
| IAD39139 | 423597 | FAT1   | chr4 | 187560870 | 187560942 | 2  | 73   | 73   | 0   | 1     |
| IAD39139 | 423596 | FAT1   | chr4 | 187584447 | 187584772 | 2  | 326  | 165  | 161 | 0.506 |
| IAD39139 | 423590 | FAT1   | chr4 | 187627711 | 187630986 | 21 | 3276 | 3276 | 0   | 1     |
| IAD39139 | 482821 | TRIP12 | chr2 | 230632264 | 230632471 | 2  | 208  | 192  | 16  | 0.923 |
| IAD39139 | 482824 | TRIP12 | chr2 | 230633326 | 230633440 | 1  | 115  | 115  | 0   | 1     |
| IAD39139 | 482803 | TRIP12 | chr2 | 230633941 | 230634046 | 1  | 106  | 106  | 0   | 1     |
| IAD39139 | 482802 | TRIP12 | chr2 | 230636229 | 230636353 | 2  | 125  | 125  | 0   | 1     |
| IAD39139 | 482826 | TRIP12 | chr2 | 230638807 | 230638982 | 2  | 176  | 176  | 0   | 1     |
| IAD39139 | 482813 | TRIP12 | chr2 | 230642025 | 230642200 | 2  | 176  | 176  | 0   | 1     |
| IAD39139 | 482811 | TRIP12 | chr2 | 230643143 | 230643308 | 1  | 166  | 166  | 0   | 1     |
| IAD39139 | 482818 | TRIP12 | chr2 | 230643586 | 230643711 | 2  | 126  | 126  | 0   | 1     |
| IAD39139 | 482807 | TRIP12 | chr2 | 230650467 | 230650576 | 1  | 110  | 110  | 0   | 1     |
| IAD39139 | 482817 | TRIP12 | chr2 | 230652215 | 230652382 | 2  | 168  | 131  | 37  | 0.78  |
| IAD39139 | 482801 | TRIP12 | chr2 | 230653508 | 230653661 | 2  | 154  | 134  | 20  | 0.87  |
| IAD39139 | 482814 | TRIP12 | chr2 | 230654321 | 230654483 | 2  | 163  | 163  | 0   | 1     |
| IAD39139 | 482809 | TRIP12 | chr2 | 230655834 | 230655972 | 2  | 139  | 112  | 27  | 0.806 |
| IAD39139 | 482806 | TRIP12 | chr2 | 230656576 | 230656786 | 2  | 211  | 211  | 0   | 1     |
| IAD39139 | 482799 | TRIP12 | chr2 | 230656863 | 230656947 | 1  | 85   | 85   | 0   | 1     |
| IAD39139 | 482823 | TRIP12 | chr2 | 230657683 | 230657866 | 2  | 184  | 143  | 41  | 0.777 |
| IAD39139 | 482837 | TRIP12 | chr2 | 230659889 | 230660051 | 2  | 163  | 163  | 0   | 1     |
| IAD39139 | 482822 | TRIP12 | chr2 | 230661301 | 230661503 | 2  | 203  | 190  | 13  | 0.936 |
| IAD39139 | 482835 | TRIP12 | chr2 | 230662400 | 230662552 | 2  | 153  | 153  | 0   | 1     |
| IAD39139 | 482836 | TRIP12 | chr2 | 230663585 | 230663770 | 3  | 186  | 186  | 0   | 1     |
| IAD39139 | 482805 | TRIP12 | chr2 | 230663993 | 230664104 | 1  | 112  | 112  | 0   | 1     |
| IAD39139 | 482808 | TRIP12 | chr2 | 230666962 | 230667180 | 2  | 219  | 219  | 0   | 1     |
| IAD39139 | 482832 | TRIP12 | chr2 | 230668281 | 230668410 | 2  | 130  | 130  | 0   | 1     |
| IAD39139 | 482828 | TRIP12 | chr2 | 230668709 | 230668948 | 2  | 240  | 210  | 30  | 0.875 |
| IAD39139 | 482827 | TRIP12 | chr2 | 230670440 | 230670523 | 1  | 84   | 75   | 9   | 0.893 |
| IAD39139 | 482816 | TRIP12 | chr2 | 230672418 | 230672585 | 2  | 168  | 152  | 16  | 0.905 |
| IAD39139 | 482825 | TRIP12 | chr2 | 230672962 | 230673090 | 1  | 129  | 110  | 19  | 0.853 |
| IAD39139 | 482820 | TRIP12 | chr2 | 230675590 | 230675766 | 2  | 177  | 177  | 0   | 1     |
| IAD39139 | 482819 | TRIP12 | chr2 | 230675846 | 230675925 | 1  | 80   | 80   | 0   | 1     |
| IAD39139 | 482798 | TRIP12 | chr2 | 230678580 | 230678752 | 2  | 173  | 111  | 62  | 0.642 |
| IAD39139 | 482810 | TRIP12 | chr2 | 230678943 | 230679046 | 2  | 104  | 104  | 0   | 1     |
| IAD39139 | 482833 | TRIP12 | chr2 | 230679809 | 230679915 | 2  | 107  | 107  | 0   | 1     |
| IAD39139 | 482815 | TRIP12 | chr2 | 230679983 | 230680029 | 2  | 47   | 47   | 0   | 1     |
| IAD39139 | 482831 | TRIP12 | chr2 | 230683074 | 230683233 | 2  | 160  | 141  | 19  | 0.881 |
| IAD39139 | 482830 | TRIP12 | chr2 | 230693903 | 230694009 | 1  | 107  | 107  | 0   | 1     |
| IAD39139 | 482804 | TRIP12 | chr2 | 230695466 | 230695542 | 1  | 77   | 77   | 0   | 1     |
| IAD39139 | 482812 | TRIP12 | chr2 | 230701558 | 230701705 | 1  | 148  | 148  | 0   | 1     |
| IAD39139 | 482834 | TRIP12 | chr2 | 230705532 | 230705648 | 2  | 117  | 112  | 5   | 0.957 |
| IAD39139 | 482800 | TRIP12 | chr2 | 230723482 | 230724295 | 7  | 814  | 814  | 0   | 1     |
| IAD39139 | 482829 | TRIP12 | chr2 | 230744692 | 230744800 | 1  | 109  | 109  | 0   | 1     |
| IAD39139 | 581684 | SP140  | chr2 | 231090554 | 231090623 | 1  | 70   | 70   | 0   | 1     |
| IAD39139 | 581673 | SP140  | chr2 | 231101792 | 231101980 | 2  | 189  | 189  | 0   | 1     |
| IAD39139 | 581685 | SP140  | chr2 | 231102922 | 231103101 | 2  | 180  | 180  | 0   | 1     |
| IAD39139 | 581700 | SP140  | chr2 | 231103470 | 231103593 | 1  | 124  | 124  | 0   | 1     |
| IAD39139 | 581690 | SP140  | chr2 | 231106113 | 231106207 | 1  | 95   | 95   | 0   | 1     |
| IAD39139 | 581686 | SP140  | chr2 | 231108440 | 231108531 | 1  | 92   | 92   | 0   | 1     |
| IAD39139 | 581676 | SP140  | chr2 | 231109697 | 231109800 | 1  | 104  | 104  | 0   | 1     |
| IAD39139 | 581680 | SP140  | chr2 | 231110572 | 231110660 | 1  | 89   | 89   | 0   | 1     |
| IAD39139 | 581682 | SP140  | chr2 | 231112625 | 231112785 | 1  | 161  | 161  | 0   | 1     |
| IAD39139 | 581692 | SP140  | chr2 | 231113594 | 231113688 | 1  | 95   | 95   | 0   | 1     |
| IAD39139 | 581689 | SP140  | chr2 | 231115690 | 231115781 | 1  | 92   | 92   | 0   | 1     |
| IAD39139 | 581678 | SP140  | chr2 | 231118025 | 231118137 | 1  | 113  | 113  | 0   | 1     |
| IAD39139 | 581675 | SP140  | chr2 | 231120161 | 231120252 | 1  | 92   | 92   | 0   | 1     |

|          |        |       |      |           |           |   |     |     |    |       |
|----------|--------|-------|------|-----------|-----------|---|-----|-----|----|-------|
| IAD39139 | 581696 | SP140 | chr2 | 231134241 | 231134338 | 2 | 98  | 98  | 0  | 1     |
| IAD39139 | 581681 | SP140 | chr2 | 231134546 | 231134673 | 2 | 128 | 128 | 0  | 1     |
| IAD39139 | 581677 | SP140 | chr2 | 231135295 | 231135359 | 1 | 65  | 38  | 27 | 0.585 |
| IAD39139 | 581698 | SP140 | chr2 | 231149055 | 231149131 | 1 | 77  | 77  | 0  | 1     |
| IAD39139 | 581687 | SP140 | chr2 | 231150461 | 231150552 | 1 | 92  | 92  | 0  | 1     |
| IAD39139 | 581695 | SP140 | chr2 | 231152601 | 231152686 | 1 | 86  | 86  | 0  | 1     |
| IAD39139 | 581674 | SP140 | chr2 | 231155169 | 231155284 | 1 | 116 | 116 | 0  | 1     |
| IAD39139 | 581688 | SP140 | chr2 | 231157355 | 231157508 | 2 | 154 | 154 | 0  | 1     |
| IAD39139 | 581679 | SP140 | chr2 | 231158980 | 231159038 | 1 | 59  | 59  | 0  | 1     |
| IAD39139 | 581694 | SP140 | chr2 | 231162130 | 231162182 | 1 | 53  | 53  | 0  | 1     |
| IAD39139 | 581697 | SP140 | chr2 | 231174633 | 231174759 | 1 | 127 | 127 | 0  | 1     |
| IAD39139 | 581699 | SP140 | chr2 | 231175452 | 231175571 | 1 | 120 | 59  | 61 | 0.492 |
| IAD39139 | 581693 | SP140 | chr2 | 231175863 | 231175951 | 1 | 89  | 89  | 0  | 1     |
| IAD39139 | 581691 | SP140 | chr2 | 231176161 | 231176315 | 2 | 155 | 155 | 0  | 1     |
| IAD39139 | 581683 | SP140 | chr2 | 231177295 | 231177404 | 1 | 110 | 100 | 10 | 0.909 |
| IAD39139 | 559057 | LYST  | chr1 | 235826234 | 235826383 | 2 | 150 | 150 | 0  | 1     |
| IAD39139 | 467721 | LYST  | chr1 | 235827278 | 235827360 | 2 | 83  | 83  | 0  | 1     |
| IAD39139 | 467760 | LYST  | chr1 | 235827759 | 235827926 | 2 | 168 | 168 | 0  | 1     |
| IAD39139 | 467719 | LYST  | chr1 | 235840385 | 235840493 | 2 | 109 | 109 | 0  | 1     |
| IAD39139 | 467715 | LYST  | chr1 | 235840774 | 235840924 | 2 | 151 | 151 | 0  | 1     |
| IAD39139 | 467759 | LYST  | chr1 | 235850243 | 235850352 | 2 | 110 | 110 | 0  | 1     |
| IAD39139 | 467708 | LYST  | chr1 | 235856644 | 235856791 | 1 | 148 | 126 | 22 | 0.851 |
| IAD39139 | 467725 | LYST  | chr1 | 235860377 | 235860577 | 3 | 201 | 201 | 0  | 1     |
| IAD39139 | 467724 | LYST  | chr1 | 235866041 | 235866282 | 2 | 242 | 242 | 0  | 1     |
| IAD39139 | 467739 | LYST  | chr1 | 235872385 | 235872613 | 3 | 229 | 229 | 0  | 1     |
| IAD39139 | 467732 | LYST  | chr1 | 235875351 | 235875502 | 2 | 152 | 152 | 0  | 1     |
| IAD39139 | 467740 | LYST  | chr1 | 235878495 | 235878662 | 2 | 168 | 168 | 0  | 1     |
| IAD39139 | 467731 | LYST  | chr1 | 235880006 | 235880083 | 2 | 78  | 78  | 0  | 1     |
| IAD39139 | 467743 | LYST  | chr1 | 235883955 | 235884210 | 3 | 256 | 256 | 0  | 1     |
| IAD39139 | 467742 | LYST  | chr1 | 235887322 | 235887485 | 2 | 164 | 154 | 10 | 0.939 |
| IAD39139 | 467752 | LYST  | chr1 | 235891370 | 235891436 | 1 | 67  | 67  | 0  | 1     |
| IAD39139 | 467745 | LYST  | chr1 | 235892890 | 235892962 | 1 | 73  | 73  | 0  | 1     |
| IAD39139 | 467757 | LYST  | chr1 | 235894141 | 235894248 | 2 | 108 | 108 | 0  | 1     |
| IAD39139 | 467750 | LYST  | chr1 | 235894326 | 235894482 | 1 | 157 | 149 | 8  | 0.949 |
| IAD39139 | 467749 | LYST  | chr1 | 235896797 | 235896996 | 2 | 200 | 200 | 0  | 1     |
| IAD39139 | 467735 | LYST  | chr1 | 235897124 | 235897211 | 1 | 88  | 88  | 0  | 1     |
| IAD39139 | 467744 | LYST  | chr1 | 235897777 | 235897964 | 3 | 188 | 188 | 0  | 1     |
| IAD39139 | 467713 | LYST  | chr1 | 235904716 | 235904933 | 3 | 218 | 218 | 0  | 1     |
| IAD39139 | 467730 | LYST  | chr1 | 235907273 | 235907462 | 2 | 190 | 189 | 1  | 0.995 |
| IAD39139 | 467747 | LYST  | chr1 | 235909630 | 235909832 | 3 | 203 | 203 | 0  | 1     |
| IAD39139 | 467718 | LYST  | chr1 | 235914504 | 235914667 | 2 | 164 | 164 | 0  | 1     |
| IAD39139 | 467754 | LYST  | chr1 | 235915299 | 235915476 | 2 | 178 | 178 | 0  | 1     |
| IAD39139 | 467753 | LYST  | chr1 | 235916338 | 235916579 | 3 | 242 | 242 | 0  | 1     |
| IAD39139 | 467748 | LYST  | chr1 | 235918772 | 235918952 | 2 | 181 | 181 | 0  | 1     |
| IAD39139 | 467720 | LYST  | chr1 | 235920575 | 235920763 | 2 | 189 | 171 | 18 | 0.905 |
| IAD39139 | 467737 | LYST  | chr1 | 235922266 | 235922904 | 5 | 639 | 639 | 0  | 1     |
| IAD39139 | 467716 | LYST  | chr1 | 235926014 | 235926156 | 3 | 143 | 143 | 0  | 1     |
| IAD39139 | 467746 | LYST  | chr1 | 235929373 | 235929582 | 2 | 210 | 210 | 0  | 1     |
| IAD39139 | 467710 | LYST  | chr1 | 235933454 | 235933602 | 2 | 149 | 149 | 0  | 1     |
| IAD39139 | 467712 | LYST  | chr1 | 235937136 | 235937296 | 2 | 161 | 143 | 18 | 0.888 |
| IAD39139 | 467755 | LYST  | chr1 | 235938207 | 235938391 | 2 | 185 | 185 | 0  | 1     |
| IAD39139 | 467741 | LYST  | chr1 | 235940357 | 235940613 | 3 | 257 | 257 | 0  | 1     |
| IAD39139 | 467738 | LYST  | chr1 | 235944159 | 235944360 | 3 | 202 | 174 | 28 | 0.861 |
| IAD39139 | 467709 | LYST  | chr1 | 235945221 | 235945392 | 3 | 172 | 172 | 0  | 1     |
| IAD39139 | 467736 | LYST  | chr1 | 235950494 | 235950678 | 2 | 185 | 185 | 0  | 1     |
| IAD39139 | 467711 | LYST  | chr1 | 235951995 | 235952150 | 2 | 156 | 156 | 0  | 1     |
| IAD39139 | 467714 | LYST  | chr1 | 235954993 | 235955430 | 4 | 438 | 438 | 0  | 1     |
| IAD39139 | 467728 | LYST  | chr1 | 235956797 | 235956917 | 2 | 121 | 121 | 0  | 1     |
| IAD39139 | 467734 | LYST  | chr1 | 235963614 | 235963691 | 1 | 78  | 78  | 0  | 1     |
| IAD39139 | 467733 | LYST  | chr1 | 235964165 | 235964402 | 3 | 238 | 238 | 0  | 1     |
| IAD39139 | 467751 | LYST  | chr1 | 235966202 | 235966369 | 2 | 168 | 168 | 0  | 1     |

|          |        |      |      |           |           |    |      |      |     |        |
|----------|--------|------|------|-----------|-----------|----|------|------|-----|--------|
| IAD39139 | 467756 | LYST | chr1 | 235967798 | 235967970 | 2  | 173  | 173  | 0   | 1      |
| IAD39139 | 467726 | LYST | chr1 | 235969037 | 235970077 | 7  | 1041 | 867  | 174 | 0.8329 |
| IAD39139 | 467729 | LYST | chr1 | 235971749 | 235973839 | 14 | 2091 | 2091 | 0   | 1      |
| IAD39139 | 467727 | LYST | chr1 | 235976265 | 235976366 | 1  | 102  | 102  | 0   | 1      |
| IAD39139 | 559058 | LYST | chr1 | 235993520 | 235993722 | 3  | 203  | 203  | 0   | 1      |
